1 **Genome-wide analysis reveals a switch in the translational program**  
2 **upon oocyte meiotic resumption**

3

4 Xuan G. Luong<sup>1,2,3,4</sup>, Enrico Maria Daldello<sup>1,2,3,4</sup>, Gabriel Rajkovic, Cai-Rong Yang<sup>1,2,3</sup>, and Marco  
5 Conti<sup>1,2,3,\*</sup>

6 <sup>1</sup> Center for Reproductive Sciences, University of California, San Francisco, CA 94143, USA

7 <sup>2</sup> Eli and Edythe Broad Center of Regeneration Medicine and Stem Cell Research, University of  
8 California, San Francisco, CA 94143, USA

9 <sup>3</sup> Department of Obstetrics and Gynecology and Reproductive Sciences, University of California,  
10 San Francisco, CA 94143, USA.

11 <sup>4</sup> These authors contributed equally: Xuan G. Luong and Enrico Maria Daldello

12 \* Correspondence: [marco.conti@ucsf.edu](mailto:marco.conti@ucsf.edu)

13

14

15

16

17

18

19

20

21

## 22 **Summary**

23           During oocyte maturation, changes in gene expression depend exclusively on translation  
24 and degradation of maternal mRNAs rather than transcription. Execution of this translation  
25 program is essential for assembling the molecular machinery required for meiotic progression,  
26 fertilization, and embryo development. With the present study, we used a RiboTag/RNA-Seq  
27 approach to explore the timing of maternal mRNA translation in quiescent oocytes as well as in  
28 oocytes progressing through the first meiotic division. This genome-wide analysis reveals a global  
29 switch in maternal mRNA translation coinciding with oocyte re-entry into the meiotic cell cycle.  
30 Messenger RNAs whose translation is highly active in quiescent oocytes invariably become  
31 repressed during meiotic re-entry, whereas transcripts repressed in quiescent oocytes become  
32 activated. Experimentally, we have defined the exact timing of the switch, the repressive function  
33 of CPE elements, and identified a novel role for CPEB1 in maintaining constitutive translation of  
34 a large group of maternal mRNAs during maturation.

## 35 **Keywords**

36 Meiosis, RNA-Seq, mouse oocyte, translation, CPEB1

## 37 **Introduction**

38           Cell development relies on elaborate changes in gene expression in order to transition  
39 through different phenotypic and functional stages that ultimately lead to terminal differentiation.  
40 Changes in gene expression are achieved through transcriptional and post-transcriptional  
41 regulations. Although transcriptional regulation is understood in considerable detail(Chen and  
42 Dent, 2014; Klemm et al., 2019), much less is known about the molecular machinery involved in  
43 translation regulation.

44           Large oligomeric complexes involving proteins and non-coding RNAs are assembled on  
45 the mRNA (Rissland, 2017) to regulate its interaction with ribosomes, its translation rate, and its  
46 stability (Rissland et al., 2017; Wu and Brewer, 2012). In somatic cells, numerous observations  
47 indicate that translation is intimately coupled with degradation of mRNAs (Jonas and Izaurralde,  
48 2015; Wu and Brewer, 2012). Proteins recruited to the mRNA interact with elements located  
49 throughout the length of the transcript (Cheng et al., 2017; Rissland, 2017). However, complexes  
50 nucleated around the 5' and 3' untranslated regions (UTRs) play a predominant role in translation  
51 and stabilization, often by controlling the length of the poly(A) tail, which is present in most mRNAs  
52 (Jacobson and Peltz, 1996; Rissland et al., 2017). In gametes and embryos, particularly, the  
53 poly(A) tail determines the translation rate and stability of a mRNA (Clarke, 2012; Radford et al.,  
54 2008; Richter and Lasko, 2011; Subtelny et al., 2014; Tay et al., 2000; Yartseva and Giraldez,  
55 2015).

56           Germ cells are unique in their properties as they progressively acquire specialized function  
57 during development (Clarke, 2012). At the same time, they maintain traits that allow for rapid  
58 transition to totipotency (Seydoux and Braun, 2006). Throughout development, germ cells often  
59 rely on unique post-transcriptional regulations rather than on transcription itself (Clarke, 2012;  
60 Kimble and Crittenden, 2007). Striking examples of this property are the growth and maturation  
61 stages of an oocyte and its transition to zygote and early embryo (Clarke, 2012; Yartseva and

62 Giraldez, 2015). During the growth phase, oocytes amass large number of maternal mRNAs  
63 through high transcriptional activity. These mRNAs are either used immediately to synthesis  
64 proteins involved in growth or are stored for future use. Indeed in all species studied, transcription  
65 ceases when an oocyte is fully grown and resumes only in the embryo. Thus, critical steps in  
66 oocyte maturation and early embryo development rely exclusively on a program of maternal  
67 mRNA translation.

68         Some properties of the molecular machinery involved in maternal mRNA translation  
69 repression or activation have been elucidated in model organisms (Kimble and Crittenden, 2007;  
70 Tadros and Lipshitz, 2005; Yartseva and Giraldez, 2015). In frogs, the cytoplasmic  
71 polyadenylation element-binding protein (CPEB) is considered a master regulator of  
72 polyadenylation and translation (Mendez and Richter, 2001; Richter, 2007). Much less is known  
73 about the role of CPEB in mammalian oocytes. Here, we have used a genome-wide approach to  
74 investigate the role of this RNA-binding protein (RBP) during the transition from quiescence to re-  
75 entry into the meiosis. Through a detailed time course, we have investigated the temporal  
76 association between maternal mRNA translation and the different steps involved in oocyte re-  
77 entry into and progression through the meiosis. Using a RiboTag/RNA-Seq strategy, we describe  
78 a genome-wide switch in the translation program of maternal mRNAs, and define new, critical  
79 functions of CPEB in the control of this switch.

## 80 Results

### 81 ***Re-entry into meiosis coincides with rapid translational changes of stable mRNAs***

82 We have used a RiboTag/RNA-Seq strategy to characterize mRNA translation in oocytes  
83 arrested at prophase I (GV) and in those undergoing meiotic maturation. (Fig. 1a). This strategy  
84 has been previously validated (Martins et al., 2016; Yang et al., 2017) and additional quality  
85 controls are reported here (Supplementary Fig. 1a-d). Upon meiotic resumption, there were both  
86 progressive increases and decreases in ribosome loading of maternal mRNAs (Fig. 1b). By late  
87 metaphase I (MI), mRNAs were either constitutively translated (n = 4284, CONSTITUTIVE),  
88 translationally repressed (n = 1722, DOWN), or translationally activated (n = 1537, UP) (FDR  $\leq$   
89 0.05, Supplementary Fig. 1e). Total mRNA levels remained stable up to MI and significant  
90 destabilization was detectable only for 3% of maternal mRNAs at late MI (Fig. 1b and  
91 Supplementary Fig. 1f). Comparison of changes in total mRNA levels (transcriptome) to changes  
92 in ribosome-associated mRNA levels (translatome) confirms this late MI destabilization (Fig. 1c),  
93 which became prominent later during MII arrest, with a subset of mRNAs remaining stable even  
94 if their translation was repressed. Changes in translation that initiate during MI were extended into  
95 and amplified at MII (Fig. 1d). Furthermore, there is a strong, positive correlation between  
96 translational changes at late MI and MII (Supplementary Fig. 1g). Therefore, the patterns of  
97 differential ribosome loading are consistent across multiple *in vitro* and *in vivo* biological replicates  
98 and across two distinct detection platforms.

99 We compared the maternal mRNAs that are translational repressed and those that are  
100 degraded in our dataset with those stabilized in mouse oocytes depleted of YTHDF2 (Ivanova et  
101 al., 2017), a RNA m(6)A reader, or CNOT6L (Horvat et al., 2018), a component of the CCR4  
102 complex, and found little overlap (Supplementary Fig. 2a-d). We do, however, observe overlap  
103 between our data and those mRNAs that are stabilized in MII in BTG4<sup>-/-</sup> mouse oocytes

104 (Supplementary Fig. 2e and f), confirming that repressed mRNAs are eventually destabilized.  
105 BTG4 is a member of the TOB family of proteins that interacts with CNOT7/8 and is required for  
106 mRNA destabilization in MII (Liu et al., 2016; Pasternak et al., 2016; Yu et al., 2016).

### 107 ***Divergent mechanisms control gene expression during mitosis and meiosis***

108       Repression of maternal mRNA translation is associated predominantly with mitochondrial  
109 and ribosomal biogenesis, while translationally activated mRNAs code for proteins with functions  
110 related to cell cycle and embryo development (Conti and Franciosi, 2018). Gene ontology (GO)  
111 analysis of UP and DOWN transcripts at late MI reinforces this association (Fig. 2a). Genome-  
112 wide comparison of our RNA-Seq data to those available for translation and transcription during  
113 mitosis (Park et al., 2016) did not reveal any significant correlation (Fig. 2b), suggesting profound  
114 differences in gene expression regulation during these processes. When the comparison between  
115 mitosis and meiosis is restricted to genes specific to cell cycle function, only nine mRNAs overlap  
116 in translation activation between mitosis and meiosis (Fig. 2c). However, a sizable group of  
117 mRNAs whose translation is activated during meiosis instead is activated transcriptionally at the  
118 S-to-M-phase transition. Although limited, overlap is also detected when translation repression  
119 during meiosis is compared with changes in translation during mitosis. Manual curation of the  
120 data confirms that decreased translation of *Cdk1* and increased translation of *Bub1b* occur during  
121 both mitosis and meiosis (Supplementary Fig. 3).

### 122 ***The pattern of mRNA translation in GV-arrested oocytes predicts changes occurring*** 123 ***during the G2-to-M-phase transition***

124       During prophase I, maternal messages display a broad spectrum of translation efficiencies  
125 (TEs) (Fig. 3a), calculated as the ratio between ribosome-bound and total mRNA levels; there is  
126 a seven-fold difference when comparing the average TE of the 10% of mRNAs with the highest  
127 TEs (high-TEs) to that of the 10% with the lowest TEs (low-TEs). To validate that TE reflects rate

128 of translation, we related these values to other available measurements (Morgan et al., 2017;  
129 Wang et al., 2010) in GV-arrested oocytes. High-TE messages have significantly longer poly(A)  
130 tails ( $\geq 70$  nts) (Fig. 3b) and are associated with increased protein accumulation as assessed by  
131 mass spectrometry (Fig. 3c).

132 GO analysis of low- and high-TE messages during prophase I arrest revealed associations  
133 antithetical to those found during meiotic maturation (Fig. 2a). Functions important for oocyte  
134 growth are significantly enriched for high-TE mRNAs, while functions important during oocyte  
135 maturation are enriched in low-TE mRNAs (Fig. 3d). We hypothesize that, upon meiotic  
136 resumption, a switch in the translation program occurs in order for the oocyte to progress through  
137 meiosis and prepare for embryogenesis. Indeed, transcripts with greater TEs become  
138 translationally downregulated (DOWN), while transcripts with lower TEs become activated (UP)  
139 during meiotic maturation (Fig. 3e). More detailed analysis reveals that translation of 99% of low-  
140 TE mRNAs is constitutive or upregulated during meiotic maturation, while translation of virtually  
141 all of high-TE mRNAs is constitutive or repressed (Fig. 3f).

142 ***Unique mRNA features are associated with the opposing translation patterns in GV-***  
143 ***arrested oocytes***

144 To understand how such a broad array of TEs is established in GV-arrested oocytes, we  
145 correlated these values with various mRNA features genome-wide (Fig. 4a). ATG density, GC  
146 content, and length of the 5'UTR are inversely correlated with TE. As for the 3'UTR,  
147 polyadenylation signal (PAS) density and GC content are positively correlated, whereas DAZL-  
148 binding element density, 3' UTR length, and cytoplasmic polyadenylation element (CPE) density  
149 are all inversely correlated. Detailed analysis confirms this strong inverse relationship between  
150 CPE density and TE, as 87% of low-TE mRNA contain putative CPEs in the 3'UTR, while this is  
151 only true for 57% of high-TE mRNAs (Fig. 4b). The absence of CPEs proximal to the PAS is  
152 significantly associated with greater TEs (Fig. 4c), and the closer a CPE is to the PAS, the less  
153 efficiently a message is translated during prophase I arrest (Fig. 4d).

154 This correlation was confirmed by CPEB1 RNA-immunoprecipitation (RNA-IP) followed by  
155 RT-qPCR (Fig. 4e). While only two of the eight candidate high-TE mRNAs (*Cdk8* and *Dnmt1*)  
156 were immunoprecipitated above background levels, both of which have  $\geq 1$  CPEs in the 3'UTR,  
157 all low-TE transcripts with CPEs in the 3'UTR were efficiently recovered in the CPEB1-IP pellet.

### 158 ***Binding of CPEB1 to CPE recruits a repressive complex in GV-arrested oocytes***

159 To elucidate the mechanisms controlling translation during prophase I arrest, we focused  
160 on members of the oocyte-secreted protein (OOSP) cluster (*Oosp1*, 2, and 3) (Paillisson et al.,  
161 2005). *Oosp1* (red) and *Oosp3* (black) are translationally repressed during prophase I arrest and  
162 activated after meiotic resumption, while *Oosp2* is highly translated in GV-arrested oocytes and  
163 its translation becomes repressed during meiotic maturation (Fig. 5a). While 60% of *Oosp2*  
164 transcripts have poly(A) tails with  $\geq 80$  nts, *Oosp1* (21%) and *Oosp2* (6%) do not show this bias  
165 (Fig. 5b). The 3'UTRs of *Oosp1* and *Oosp3* have two and four putative CPEs upstream of the  
166 PAS, respectively, while *Oosp2* has no obvious CPE.

167 Either *YPet-Oosp1* or *YPet-Oosp2* mRNAs (Fig. 5c and d) were injected into oocytes  
168 along with polyadenylated *mCherry* mRNA and the translation of YPet was monitored *via*  
169 quantitative live cell imaging (Supplementary Fig. 4a). The patterns of YPet accumulation for the  
170 *Oosp1* and *Oosp2* reporters recapitulate the translation patterns of the mRNAs during meiotic  
171 maturation as observed in the RNA-Seq data (Fig. 5c). During prophase I arrest, *YPet-Oosp1-*  
172 *oligo(A)* was translated at a significantly lower rate than *YPet-Oosp2-oligo(A)* (Fig. 5e and 5f).  
173 Notably, the translation rate of *YPet-Oosp2-oligo(A)* significantly increased during incubation,  
174 whereas translation rate of the polyadenylated reporter (*YPet-Oosp2-poly(A)*) was initially high  
175 and remained steady (Fig. 5g and Supplementary Fig. 4b and c). When polyadenylation of the  
176 *Oosp1* reporter was forced, the translation rate was initially high but decreased to levels  
177 comparable to those of the oligoadenylated reporter (Fig. 5h and Supplementary Fig. 4b and d).



178 Therefore, regardless of its initial adenylation state, a reporter will eventually be translated at a  
179 rate dictated by the 3'UTR (Supplementary Fig. 4e).

180 In *YPet-Oosp1*, single as well as combined mutations of CPE1 and CPE2 in the 3'UTR  
181 (Fig. 5i) resulted in de-repressed translation to levels similar to those of *YPet-Oosp2* (Fig. 5j and  
182 k). These findings indicate a role of CPEs in the recruitment of an inhibitory complex. Using an  
183 oocyte-specific, CPEB1 loss-of-function model (Supplementary Fig. 5), we investigated the  
184 consequences of CPEB1 depletion on translation. While no significant difference in *Ypet-Oosp1*  
185 translation were detected between CPEB1<sup>+/+</sup> and CPEB1<sup>+/-</sup> oocytes, translation in CPEB1<sup>-/-</sup>  
186 oocytes was significantly de-repressed (Fig. 5l and m). Of note, the effects of CPEB1 depletion  
187 on *Oosp1* de-repression were not as prominent as those achieved by mutating the CPEs in  
188 *Oosp1*. These results provide strong evidence that CPEB1 binding to CPEs is necessary for  
189 translation repression during prophase I arrest. However, regardless of the distance from the  
190 PAS, addition of a CPE into the 3'UTR of *Oosp2* was not sufficient to repress its translation rates  
191 (Supplementary Fig. 6).

192 ***Translation repression during meiotic maturation is dependent on mRNA deadenylation***  
193 ***and is dissociated from destabilization***

194 From prophase I to late MI, ribosome loading for 1722 transcripts is decreased (DOWN,  
195 FDR  $\leq$  0.05). Translation repression is observed at as early as pro-metaphase I, but also occurs  
196 later on during meiosis (Fig. 1b and Supplementary Fig. 7 and 8). For 92% of DOWN transcripts,  
197 repression does not coincide with message destabilization, indicating that these two processes  
198 are mechanistically decoupled. Several DOWN candidates with stable mRNA levels were chosen  
199 for further investigation, including *Oosp2* and mRNAs that code for components of the *zona*  
200 *pellucida* (*Zp1*, *Zp2*, and *Zp3*) and the chromosome condensin complex (*Smc4*) (Fig. 6a). RT-  
201 qPCR confirmed the stability of these mRNAs, with all levels being constant up to 8 hrs and most  
202 up to 16 hrs of meiotic maturation (MII) (Fig. 6b). Poly(A) tail length (PAT) assays documents that

203 *Smc4* and *Zp2* were polyadenylated in prophase I (Supplementary Fig. 9a) and, by 2 hrs, their  
204 poly(A) tails were significantly shortened (Fig. 6c).

205 ***A CPE in close proximity of the PAS is required to maintain translation during meiotic***  
206 ***maturation***

207 The *YPet-Zp2* reporter was translated at relatively high and steady rates during prophase  
208 I and translation was repressed shortly after GVBD (Fig. 7a and b), in agreement with the RNA-  
209 Seq data (Fig. 6a) and PAT assay (Fig. 6c). Similar results were obtained with *YPet-Smc4*  
210 (Supplementary Fig. 9b and c) and *Ypet-Oosp2* (see below). Oocytes released from cilostamide  
211 block and simultaneously treated with the CDK1 inhibitor dinaciclib did not show differences in  
212 *YPet-Zp2* translation rates when compared to oocytes maintained in cilostamide, suggesting that  
213 CDK1 activation and GVBD are required for translation repression. PKA inhibitor treatment (Rp-  
214 cAMPS), used to block cAMP signaling, again resulted in no repression, indicating that cAMP is  
215 not a signal involved in translation repression (Fig. 7c). However, treatment of oocytes with  
216 dinaciclib after GVBD (2 hrs) resulted in decreased translation repression as compared to control  
217 oocytes. Therefore, CDK1 activation and GVBD are events necessary to trigger translational  
218 repression of *Zp2* upon meiotic resumption.

219 To elucidate the mechanisms of constitutive or repressed translation during meiotic  
220 maturation, we monitored the translation of the *CcnB2* reporter, which is constitutively translated  
221 before and after GVBD. Progressive deletions of the *Ccnb2 short* 3'UTR revealed that a reporter  
222 retaining only the PAS sequence (*YPet-CcnB2 short (102-118)*) was translated like a prototypical  
223 DOWN gene; it was highly translated during prophase I and translation became repressed after  
224 GVBD (Fig. 7d). Presence of the first 42 nts of the 3'UTR did not significantly affect the translation  
225 pattern (Supplementary Fig. 10a). If the 3'UTR included a CPE (*YPet-Ccnb2 short ( $\Delta$ 49-102)*),  
226 translation of the reporter was no longer repressed post-GVBD (Fig. 7d) and resembled the  
227 pattern of a prototypical CONSTITUTIVE mRNA. Therefore, the presence a CPE is critical for an

228 mRNA to evade translation repression during meiotic maturation. This was confirmed by a gain-  
229 of-function experiment using a repressed mRNA, where insertion of a CPE was sufficient to  
230 maintain the high, prophase I translation rate of *YFP-Zp2* after meiotic resumption (Fig. 7e).

231 We tested whether CPE position in relation to the PAS is important for the maintenance  
232 of translation post-GVBD by using the *Oosp2* 3'UTR. When a CPE was added 22 nts upstream  
233 of the PAS, reporter translation was no longer repressed upon meiotic resumption, but maintained  
234 at the constant rate as in prophase I (Fig. 7f and Supplementary Fig. 10b). However, if the same  
235 CPE was added 111 nts upstream of the PAS, translation was still repressed post-GVBD and the  
236 pattern did not differ from that of *YPet-Oosp2* (Fig. 7f and Supplementary Fig. 10b). Therefore,  
237 during meiotic maturation, inclusion of a CPE proximal to the PAS in the 3'UTR of a translationally  
238 repressed mRNA (gain-of function) changed its translation pattern to that of a constitutively  
239 translated mRNA. Conversely, removal of a CPE proximal to the PAS from the 3'UTR of a  
240 constitutively translated mRNA (loss-of-function) transformed its translation pattern to that of a  
241 repressed mRNA.

242 Genome-wide analysis shows that 82% of CONSTITUTIVE mRNAs have at  $\geq 1$  CPEs in  
243 the 3'UTR, while this is true for only 47% of DOWN mRNAs (Fig. 7g). Further analysis of these  
244 classes reveals a bias towards the presence of CPEs within 50 nts upstream of the PAS in  
245 constitutively translated mRNAs (Supplementary Fig. 11).

246 ***Activation of translation during meiotic maturation is dependent on GVBD and, in part,***  
247 ***activation of CDK1***

248 Concurrent with translation repression, progression through meiosis is associated with  
249 significant increases in translation of 1537 maternal mRNAs (UP, FDR  $\leq 0.05$ ) (Supplementary  
250 Fig. 1e). These UP mRNAs show both early and late increased translation (Supplementary Fig.  
251 12). To investigate the mechanisms underlying this activation, we chose candidates with some of  
252 the highest fold changes in ribosome loading from prophase I to late MI, *Tcl1*, *Oosp1*, *Obox5*,

253 *Ccnb1*, and *Ewsr1* (Fig. 8a). RiboTag/RT-qPCR confirmed the translation pattern of these UP  
254 transcripts (Fig. 8b). To investigate the link between cell cycle and the translation program during  
255 meiosis, we used a YPet reporter fused with the *Ccnb1* 3'UTR, a transcript whose translation  
256 activation after GVBD has been shown to be CDK1-dependent (Han et al., 2017). When CDK1  
257 activity was inhibited immediately after release from PDE inhibition, GVBD did not occur and  
258 translation was maintained at levels prior to cilostamide release (Fig. 8c). Oocytes treated with  
259 dinaciclib after GVBD (2 hrs) eventually regained a nuclear membrane, indicating effective CDK1  
260 inhibition, and translation of *YPet-Ccnb1* was reduced, but not abolished. This experiment was  
261 also performed using *YPet-Ewsr1*, *YPet-Oosp1*, and *YPet-Mos* (Supplementary Fig. 13). While  
262 dinaciclib treatment of GV-arrested oocytes completely inhibited translation of all the reporters,  
263 CDK1 inhibition after GVBD only decreased the translation of *YPet-Ccnb1* and *YPet-Ewsr1*; the  
264 translation of *YPet-Oosp1* and *YPet-Mos* was unaffected (Fig. 8d). Therefore, early CDK1 activity  
265 responsible for GVBD is required for translation activation of these candidates, while CDK1  
266 activity in MI is only partially responsible for subsequent increases in translation of *Ccnb1* and  
267 *Ewsr1*. The variable effects of dinaciclib may be due to subtle differences in the timing and  
268 mechanism's of translation activation.

269 Regulation of mRNA translation by CDK1 is thought to be mediated by phosphorylation of  
270 CPEB1 (Ballantyne et al., 1997; Han et al., 2017). Genome-wide analysis reveals that 95% of UP  
271 transcripts have  $\geq 1$  CPEs in the 3'UTR (Fig. 8e). Using *CPEB1*<sup>-/-</sup> oocytes, we investigated the  
272 role of CPEB1 in the regulation of *Ccnb1* translation. *CPEB1*<sup>-/-</sup> oocytes showed significantly  
273 decreased, but not abolished, translation rates as compared to wild type oocytes (Fig. 8f and g).  
274 Moreover, depletion of CPEB resulted in higher translation rates prior to GVBD (Fig. 8g),  
275 confirming the role of this RBP in translation repression during prophase I. Single mutations of  
276 CPE1 and CPE2 in *Oosp1* resulted in a significant increase in initial reporter translation, but there  
277 were no effects on translation activation post-GVBD (Fig. 8h and i). This indicates that both CPEs  
278 are necessary for translation repression during prophase I, but only one CPE is sufficient for

279 translation activation. Mutation of both CPEs did not further de-repress translation before GVBD,  
280 but completely abolished translation activation post-GVBD (Fig. 8h and i), suggesting that  
281 translation activation is not simply due to de-repression and that the two processes are  
282 dissociated.  
283

## 284 **Discussion**

285 Female gamete development is driven by transcription of not only maternal mRNAs  
286 essential for the expansive growth taking place during this phase, but also of mRNAs needed for  
287 the synthesis of proteins used later on during meiotic progression and embryo development. To  
288 accomplish this developmental program, not all mRNAs are translated immediately after  
289 synthesis. Some are, instead, stored for future use during later stages of development and their  
290 translation is repressed until then. In this study, we used a genome-wide approach to demonstrate  
291 that translation of housekeeping and instructive mRNAs in quiescent GV-arrested oocytes is due  
292 only in part to low complexity 3'UTRs and therefore is not the default pathway. Robust translation  
293 of 84% of high-TE mRNAs is associated with 3' UTRs that are > 200 nts and include putative  
294 binding elements for known RBPs. Conversely, translation repression in quiescent oocytes is  
295 dependent on the assembly of complexes that promote deadenylation; our data suggest that this  
296 complex is nucleated by CPEB1. CPEB1 is not sufficient, though, as repression is mitigated, not  
297 abolished, in CPEB1<sup>-/-</sup> oocytes. Either compensatory mechanisms or alternative repressive  
298 networks are functional in these GV-arrested oocytes. As the oocyte resumes meiosis, a switch  
299 in the translation program occurs at around the time of germinal vesicle breakdown. Messenger  
300 RNAs translated at high levels during growth become deadenylated and repressed in a manner  
301 dependent on the properties of the 3'UTR, but total levels remain stable for the majority of these  
302 mRNAs. Conversely, translation of mRNAs that were repressed in quiescent oocytes becomes  
303 progressively activated through MI and MII.

304 The timing of translational repression is unique for each mRNA. In frog oocytes, it is  
305 proposed that the deadenylase PARN is released at nuclear envelope breakdown, inducing the  
306 default process of deadenylation (Barnard et al., 2004; Mendez et al., 2000a; Mendez et al.,  
307 2000b). This mechanism may apply to only a minority of mRNAs in mouse oocytes, as 77% of  
308 the maternal mRNA analyzed are translationally repressed well after GVBD, during MI or later. It

309 should be noted that, in some cases, translation repression coincides with inactivation of the  
310 encoded protein. For example, CPEB1 protein degradation initiates at four to six hours post-  
311 meiotic resumption (Han et al., 2017; Mendez et al., 2002). Our RNA-Seq data indicate that  
312 ribosome association with *Cpeb1* mRNAs begins to decrease around this time. Translation of  
313 *Cdk1* similarly decreases at the MI-to-anaphase transition, when M-Phase-promoting factor  
314 (MPF) is inactivated because of CCNB1 degradation (Evans et al., 1983). Thus, changes in  
315 message translation likely cooperates with protein turnover to regulate functions during meiosis.

316 Our genome-wide analysis of translation demonstrates that the environment of stable  
317 maternal mRNAs present during oocyte growth extends well into the late stages meiosis. Here,  
318 we have identified a first wave of mRNA destabilization at the MI-to-anaphase transition that  
319 affects a subset of mRNAs; most messages that are translationally activated along with a subset  
320 of translationally repressed mRNAs continue to remain stable well into MII. Eventually, these  
321 maternal messages will be eliminated later on in the zygote and in the embryo at the time of  
322 zygote genome activation in two successive waves of degradation (Yartseva and Giraldez, 2015).  
323 Recently, mRNA methylation has emerged as a key regulator of mRNA stability and the m6A  
324 reader YTHDF2 has been implicated in message destabilization in the oocyte (Ivanova et al.,  
325 2017; Wang et al., 2014). However, we found minimal overlap between mRNAs destabilized in  
326 MI and those stabilized by YTHDF2 loss-of-function. Thus, the code controlling timed  
327 destabilization remains poorly understood. However, a CCR4/CNOT complex that includes  
328 CNOT7/8 and BTG4 is responsible for destabilization of a subset of repressed mRNAs (Liu et al.,  
329 2016; Pasternak et al., 2016; Yu et al., 2016). Our RiboTag/RNA-Seq data do indicate that the  
330 machinery required for mRNA destabilization/degradation is synthesized late during oocyte  
331 maturation due to delayed translation of mRNAs such as *Btg4*, *Cnot7*, and *Dcp1a*.

332 CPEB1 is considered a master regulator of translation during oocyte meiosis. Our findings  
333 are consistent with this concept, as 95% of mRNAs significantly activated from prophase I to late

334 MI have at least one CPE in the 3'UTR and all translationally activated candidates we tested  
335 interact with CPEB1. Depletion of CPEB1 in the oocyte did not completely abolish translation  
336 activation, pointing to the presence of other RBPs with similar function to CPEB1 or other  
337 compensatory mechanisms. Moreover, we have characterized an additional function of this RBP  
338 during oocyte maturation: CPEB1 is required for maintaining translation of thousands of maternal  
339 mRNAs, preventing their deadenylation. Our genome-wide data provide evidence that a CPE in  
340 close proximity of the PAS is required for this widespread translation of the majority of maternal  
341 mRNAs. Studies in frog oocytes have revealed the presence of a combinatorial code of CPEs  
342 enforcing repression and early and late activation(Pique et al., 2008). Our global analysis  
343 documents that CPE elements cluster in the vicinity of the PAS (< 100 nts), and that both  
344 repression and activation are associated with the presence of more than one CPE element in the  
345 3'UTR. Using *Oosp1* mRNA as prototypic mRNA repressed in prophase and activated in MI, we  
346 demonstrated that two CPEs are required for repression, but one CPE is sufficient for activation.  
347 Although some of the features of the combinatorial code described in *Xenopus* were confirmed,  
348 more complex rules govern the functions of CPEs in oocyte translation.

349 We demonstrate that the pattern of translation switches at the time CDK1 is activated in  
350 the oocyte. If CDK1 activity is inhibited, no activation or repression of translation takes place and  
351 GVBD, however, is also blocked. Under our experimental conditions and if CDK1 inhibition is  
352 delayed after GVBD, translation of some mRNAs including *CcnB1* and *Ewsr1* was partially  
353 inhibited whereas that of *Mos* and *Oosp1* was not significantly affected. A possible explanation of  
354 this differential sensitivity to CDK1 is the presence of distinct mechanisms of translational  
355 activation downstream of CDK1. Differences in translation mechanisms for *Mos* and *Ccnb1* have  
356 been demonstrated in frog oocytes(Mendez et al., 2002; Sheets et al., 1994). However, given the  
357 very rapid re-entry in meiosis of mouse oocytes, we are unable to dissect possible CDK1-  
358 independent mechanisms of translation activation.



359           In summary, our genome-wide approach provides a novel perspective on the dynamics of  
360 the translational program in mouse oocytes. Since the combinatorial code described in frog  
361 oocytes(Pique et al., 2008) is applicable only to a subset of mammalian mRNAs, more complex  
362 mechanisms are functioning in mammalian oocytes. Additionally, to be defined is whether a  
363 CPEB-mediated translation program is required during oocyte growth as short, low complexity  
364 3'UTRs are associated with only a portion of the mRNA translated during growth. Finally,  
365 differences in how the translation program is executed between mouse and human must exist  
366 and should to be explored to gain a better understanding of the human oocyte-to-zygote transition  
367 and female fertility.

## Acknowledgments

We are indebted to John C. Wright (University of California, Berkeley) for assistance with bioinformatics analyses, as well as Elena Gochez (San Francisco VA Health Care System) and Emily Miller (Stanford University) for technical assistance. We thank Dr. Raúl Méndez and Dr. Gonzalo Fernandez-Miranda (The Barcelona Institute of Science and Technology) for sharing the CPEB1-targeted mice. X.G.L. was supported by 5T32HD7263-35 and E.M.D. was supported by the Lalor Foundation postdoctoral fellowship. This work was supported by National Institutes of Health: NIH R01 GM116926 and P50 HD055764.

## Author Contributions

Conceptualization: X.G.L., E.M.D., and M.C.; Methodology: X.G.L., E.M.D., and M.C.; Software: X.G.L.; Validation: X.G.L. and E.M.D.; Formal Analysis: X.G.L., E.M.D., and M.C.; Investigation: X.G.L., E.M.D. G.R., and C.Y.; Resources: M.C.; Data curation: X.G.L.; Writing – Original Draft: X.G.L., E.M.D., and M.C.; Writing – Review & Editing: X.G.L., E.M.D., G.R., C.Y., and M.C.; Visualization: X.G.L. and E.M.D.; Supervision: M.C.; Project administration: X.G.L., E.M.D., and M.C.; Funding acquisition: X.G.L., E.M.D., and M.C.

X.G.L. and E.M.D. contributed equally to this study.

## Declaration of Interests

The authors declare no competing interests.

# Figure 1

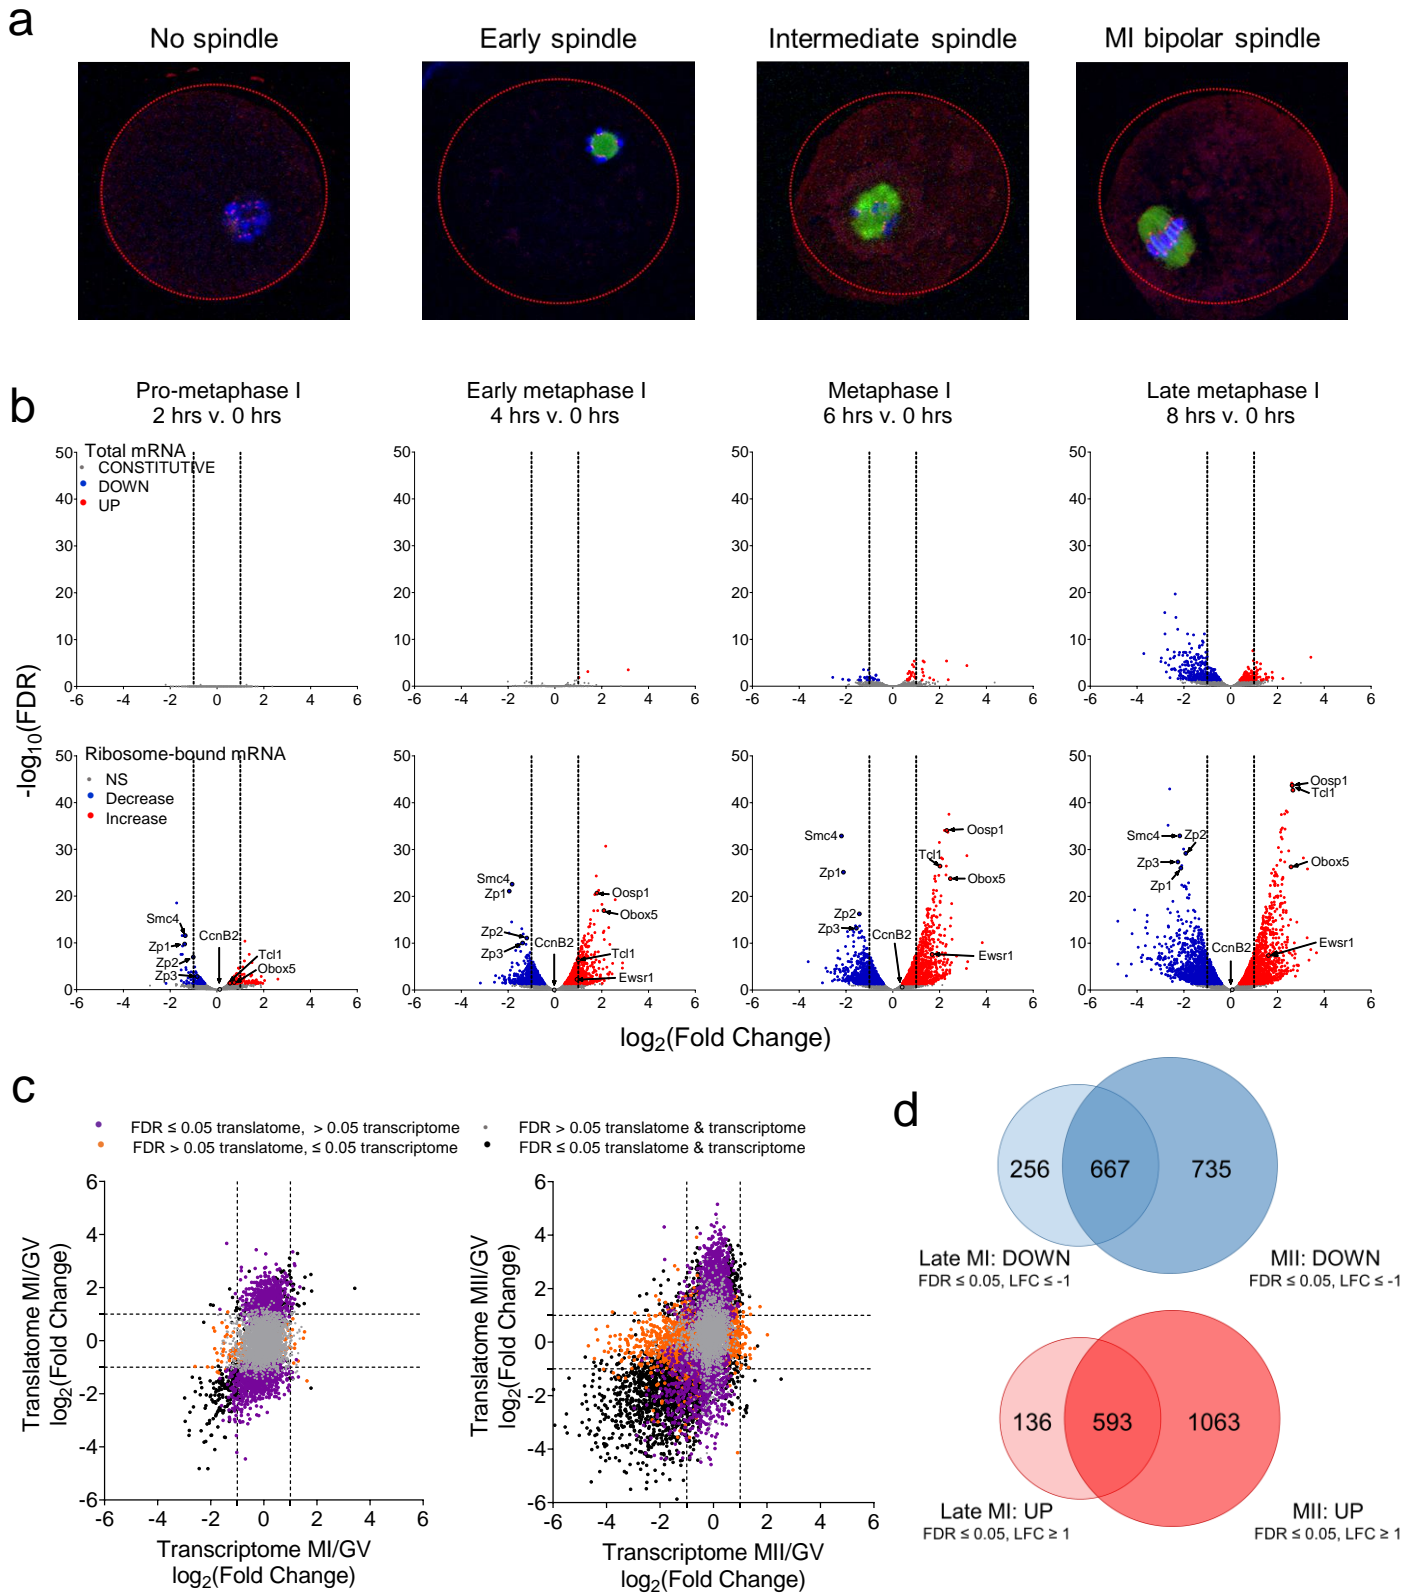

**Fig. 1. The translational program during oocyte meiotic cell cycle involves both translational repression and activation**

**a)** Spindle and chromatin conformation in the oocyte during meiosis. Oocytes were matured *in vitro* and fixed at 0, 2, 4, 6, and 8 hrs post-meiotic resumption. Immunofluorescence staining for tubulin (green), kinetochores (red), and chromatin (blue) was performed. Maturing oocytes either presented chromosome condensation, but no spindle assembly (2 hrs, pro-metaphase I), visible initial spindle formation (4 hrs, early MI), progressive spindle formation with kinetochore attachment (6 hrs, MI), or a fully attached, MI-bipolar spindle (8 hrs, late MI). **b)** Total mRNA levels and differential ribosome loading during meiotic progression as compared to prophase I arrest. Oocytes were matured *in vitro* and collected at 0, 2, 4, 6, and 8 hrs post-meiotic resumption. Total RNA samples were collected prior to RiboTag-IP for each time point. cDNA libraries were prepared from total and ribosome-bound RNA samples, RNA-Seq was performed, and the data processed and analyzed as described in the “Methods”. The data are presented as volcano plots with  $\log_2(\text{fold change})$  (LFC) CPM at each time point compared to 0 hrs and plotted against false discovery rate (FDR). Statistically significant increased (red) and decreased (blue) ( $\text{FDR} \leq 0.05$ ) genes are reported as well as non-significant changes (grey). LFCs  $\leq -1$  or  $\geq 1$  are considered biologically significant and are marked by dashed lines. Two biological replicates of 200 oocytes per time point were used for this experiment. **c)** Changes in the transcriptome and translome during meiosis. The late MI data are derived from the experiment described in Fig. 1b, MII translation data are from a deposited dataset generated from oocytes matured *in vivo* followed by polysome fractionation/microarray (polysome array)(Chen et al., 2011; Conti and Franciosi, 2018); and prophase-to-MII total mRNA data were from a deposited dataset(Su et al., 2007). The data are reported as scatterplots with LFC in total mRNA CPM at either late MI or MII compared to prophase I arrest versus the LFC of ribosome-bound mRNA CPM at the same time points. We

identified four groups of messages: transcripts that showed significant changes only in translation (purple), significant changes only in total message levels (orange), no significant changes in translation nor in total transcript levels (grey), and significant changes in both translation and total transcript levels (black); significant changes are defined as  $FDR \leq 0.05$ . Two biological replicates of 200 oocytes per time point were used to generate the RNA-Seq data, while six biological replicates of 500 oocytes per time point were used to generate the polysome array data. **d)** Overlap of translational changes between late MI and MII. Both DOWN (blue) and UP (red) genes were analyzed. The data were collected as described in Fig. 1c. LFCs  $\leq -1$  or  $\geq 1$  with  $FDR \leq 0.05$  are considered statistically significant.

# Figure 2

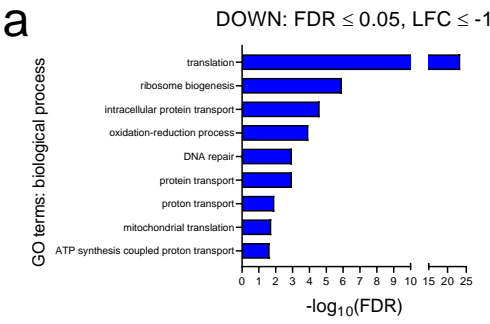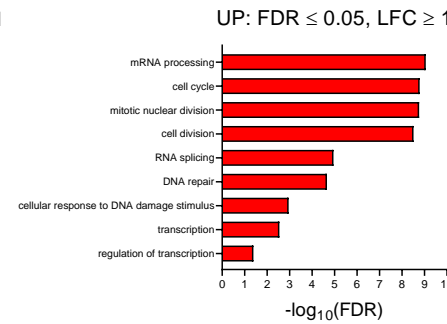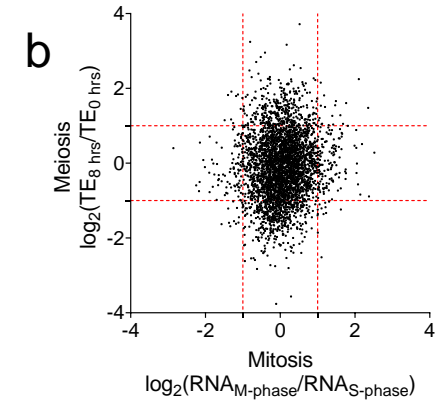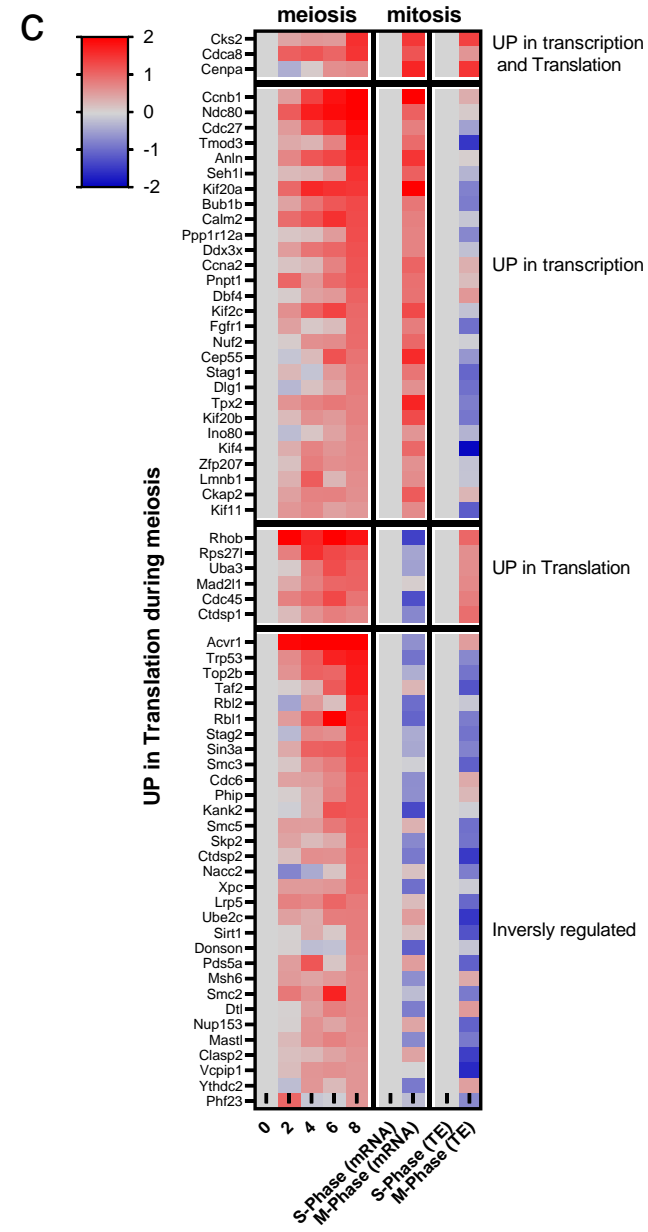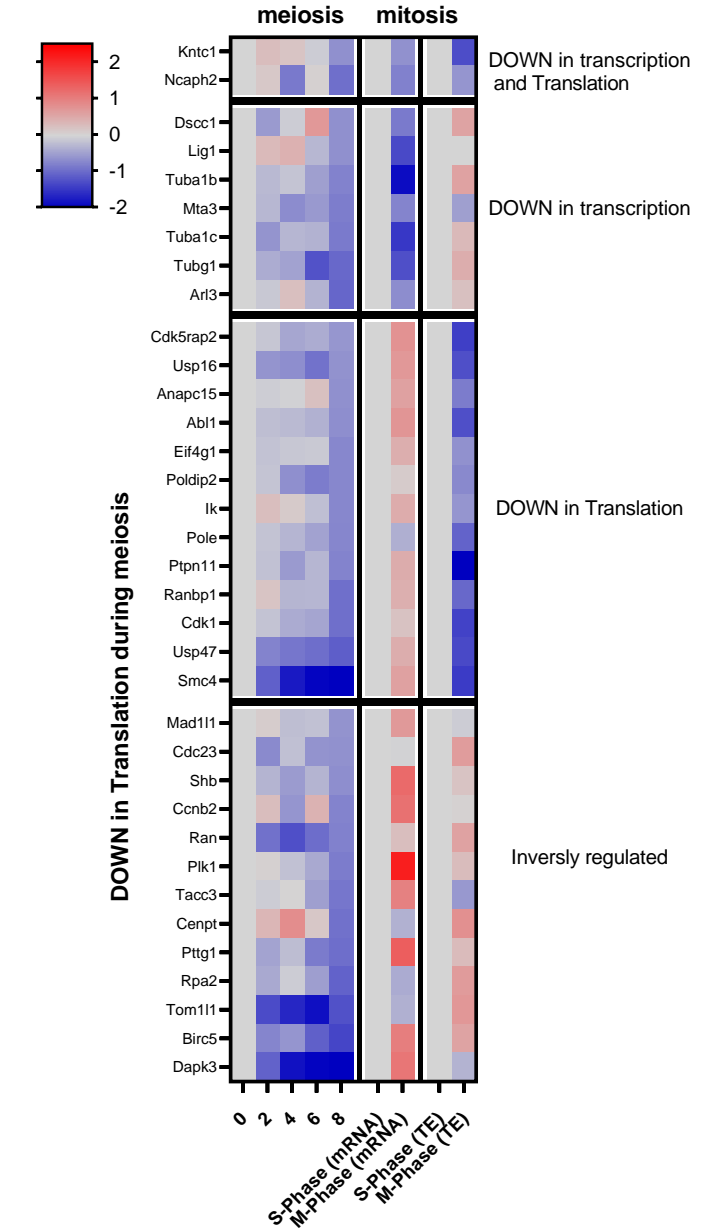

**Fig. 2. Cell cycle components are regulated via translation in meiosis, but via transcription in mitosis**

**a)** Gene ontology analysis of DOWN and UP genes. DOWN (blue) and UP (red) mRNAs significantly changed from 0 hrs (prophase I arrest) to 8 hrs (late MI) post-meiotic resumption were used ( $-1 \geq \text{LFC} \geq 1$  and  $\text{FDR} \leq 0.05$ ). Only terms with  $\text{FDR} \leq 0.05$  were considered. **b)** Pairwise comparison of translation during meiosis and transcription during mitosis. FCs in translational efficiency (TE) from 0 hrs (prophase I arrest) to 8 hrs (late MI) in our RNA-Seq dataset are plotted against FCs in RNA levels from S-phase to M-phase found in a deposited dataset (Park et al., 2016). **c)** Heat maps comparing fold changes in translation of cell cycle components during meiosis in oocytes and fold changes in transcription or translation during the mitotic cell cycle. The data were collected as described in Fig. 2b. Genes involved in the cell cycle are as defined under GO:0007049.

# Figure 3

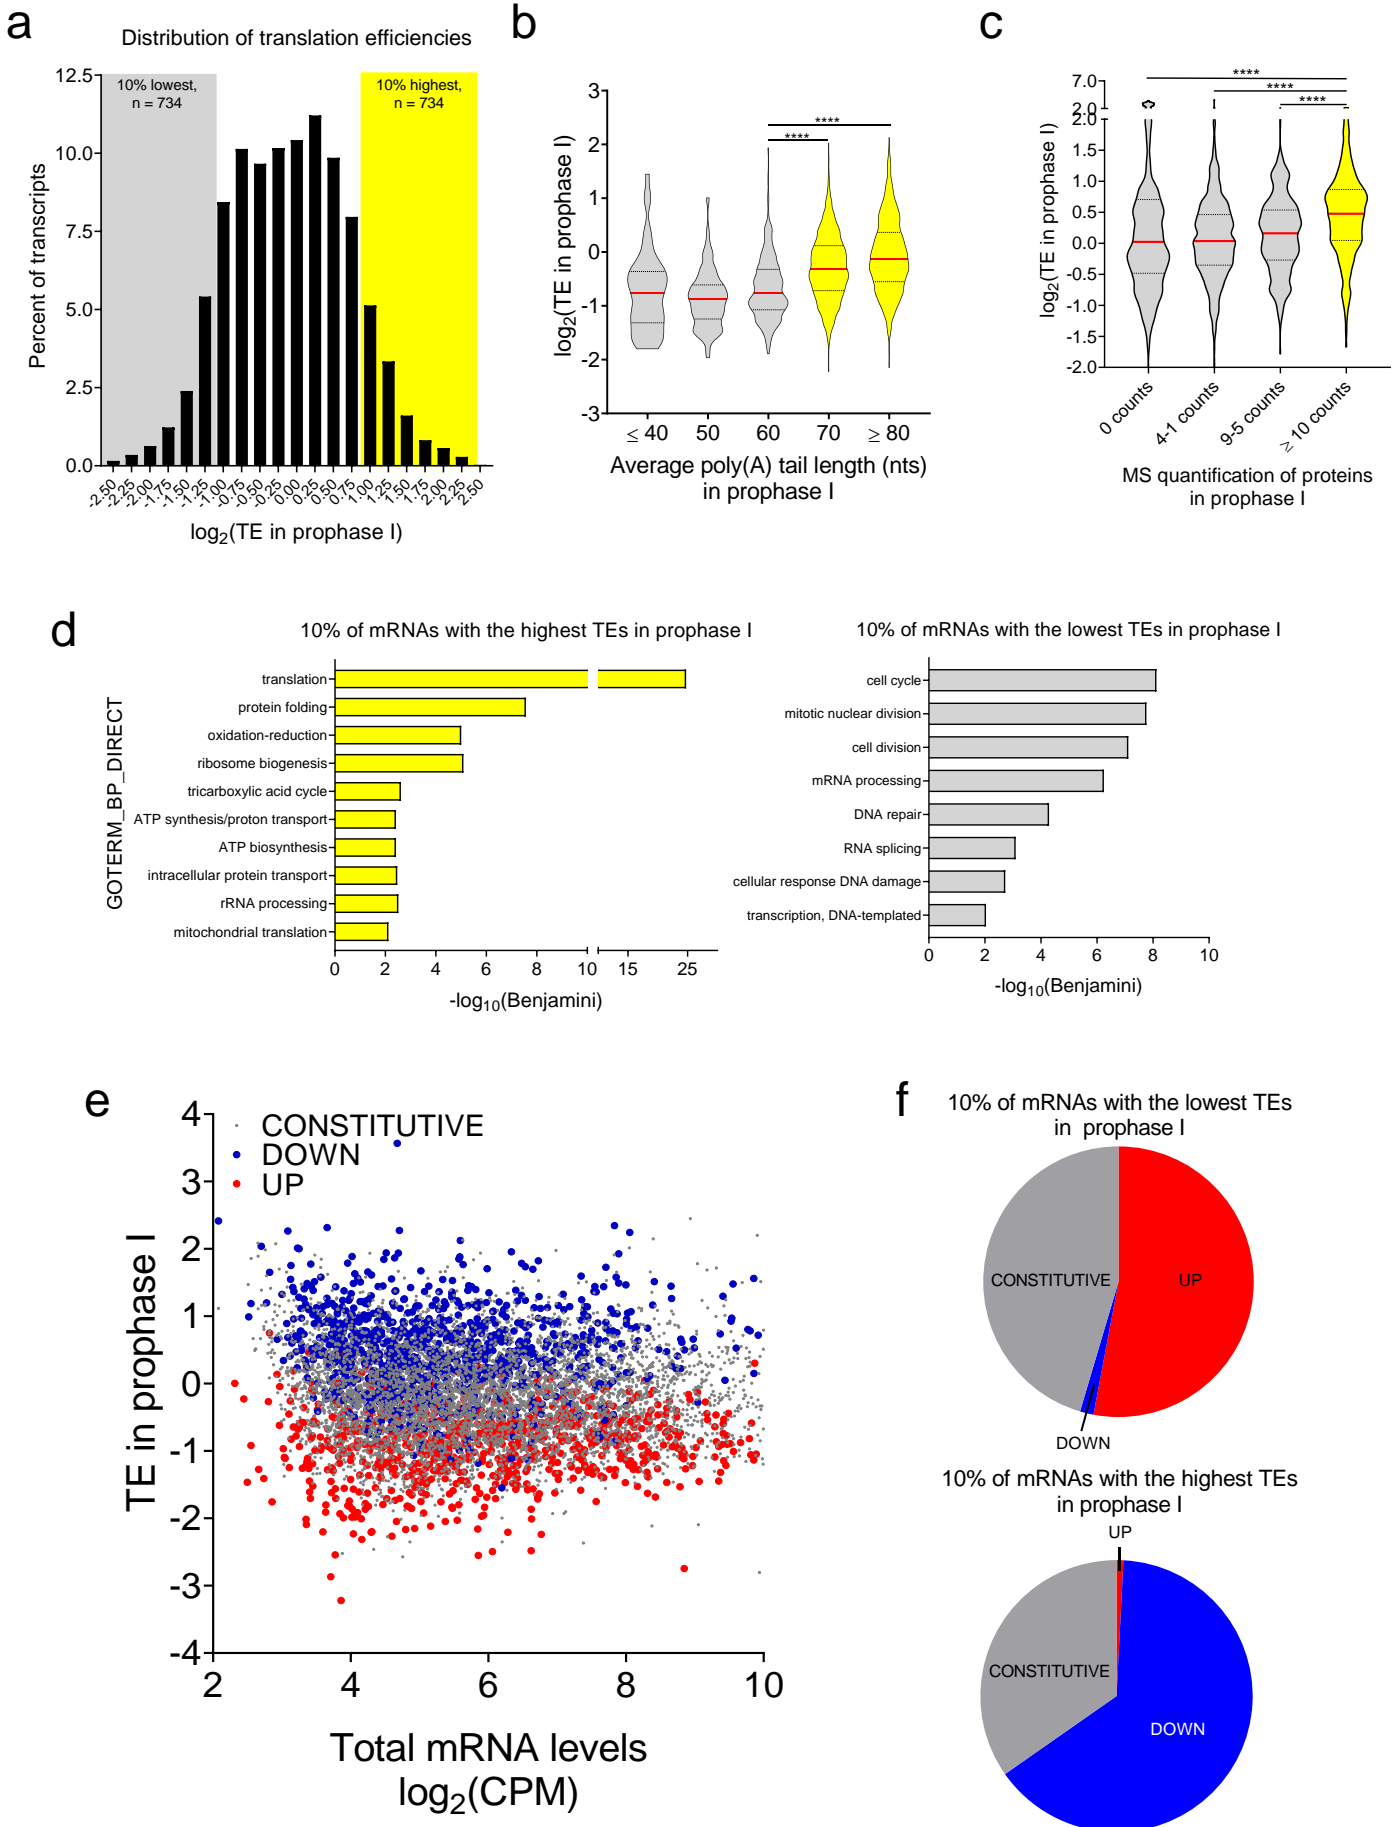



**Fig. 3. Genome-wide analysis of translation reveals a switch in the translation program at the quiescence-to-meiotic cell cycle re-entry transition**

**a)** Histogram of translational efficiencies in GV-arrested oocytes. Translation efficiency (TE) for individual mRNAs was calculated as the ratio between ribosome-associated and total mRNA CPMs. Plotted is the distribution of TE values of maternal mRNAs during prophase I arrest. The 10% of mRNAs with the lowest TEs are designated as low-TE mRNAs ( $n = 734$ , grey box) and the 10% of mRNAs with the highest TEs as high-TE mRNAs ( $n = 734$ , yellow box); this definition is used for all the subsequent comparisons. **b)** Genome-wide relationship between TE and poly(A) tail length in GV-arrested oocytes. TE was calculated for individual mRNAs as described in Fig. 3a. Deposited TAIL-Seq data on poly(A) tail length of maternal mRNAs during prophase I arrest (Morgan et al., 2017) were associated with their TEs during this time. Median values are represented by red lines and the 25 and 75% quartiles are represented by black, dashed lines. Statistical significance was evaluated by unpaired, two-tailed t-tests. \*\*\*\*:  $p < 0.0001$ . **c)** Genome-wide relationship between TE and protein levels in GV-arrested oocytes. TE was calculated for individual mRNAs as described in Fig. 3a. Deposited data on protein levels in GV-arrested oocytes as quantified by mass spectrometry (Wang et al., 2010) were associated with the TEs of maternal mRNAs. Median values are represented by red lines and the 25 and 75% quartiles are represented by black, dashed lines. Statistical significance was evaluated by unpaired, two-tailed t-test; \*\*\*\*:  $p < 0.0001$ . **d)** Gene ontology analysis of low- and high-TE maternal mRNAs in GV-arrested oocytes. Only terms with a Benjamini coefficient  $\leq 0.05$  were considered. **e)** Genome-wide relationship between TE in prophase I arrest and translation pattern during meiotic resumption of oocyte maternal mRNAs. TE was calculated for individual mRNAs as described in Fig. 3a. The data are presented as a scatterplot of total mRNA CPMs compared to TE values in GV-arrested oocytes. Transcripts are then categorized as CONSTITUTIVE (grey), DOWN (blue), or UP (red) on the basis of their translation pattern during maturation to late MI ( $-1 \geq \text{LFC} \geq 1$  and

FDR  $\leq$  0.05). **f)** Detailed analysis of the relationship between TE in prophase I arrest and translation pattern during meiotic resumption of low- and high-TE mRNAs. Pie charts report the percentage of low- or high-TE mRNAs in GV-arrested oocytes that are UP, DOWN, or CONSTITUTIVE during meiotic maturation. Ninety-nine percent of low-TE mRNAs are either UP (53%) or CONSTITUTIVE (46%) and all the high-TE mRNAs are either DOWN (65%) or CONSTITUTIVE (35%).

## Figure 4

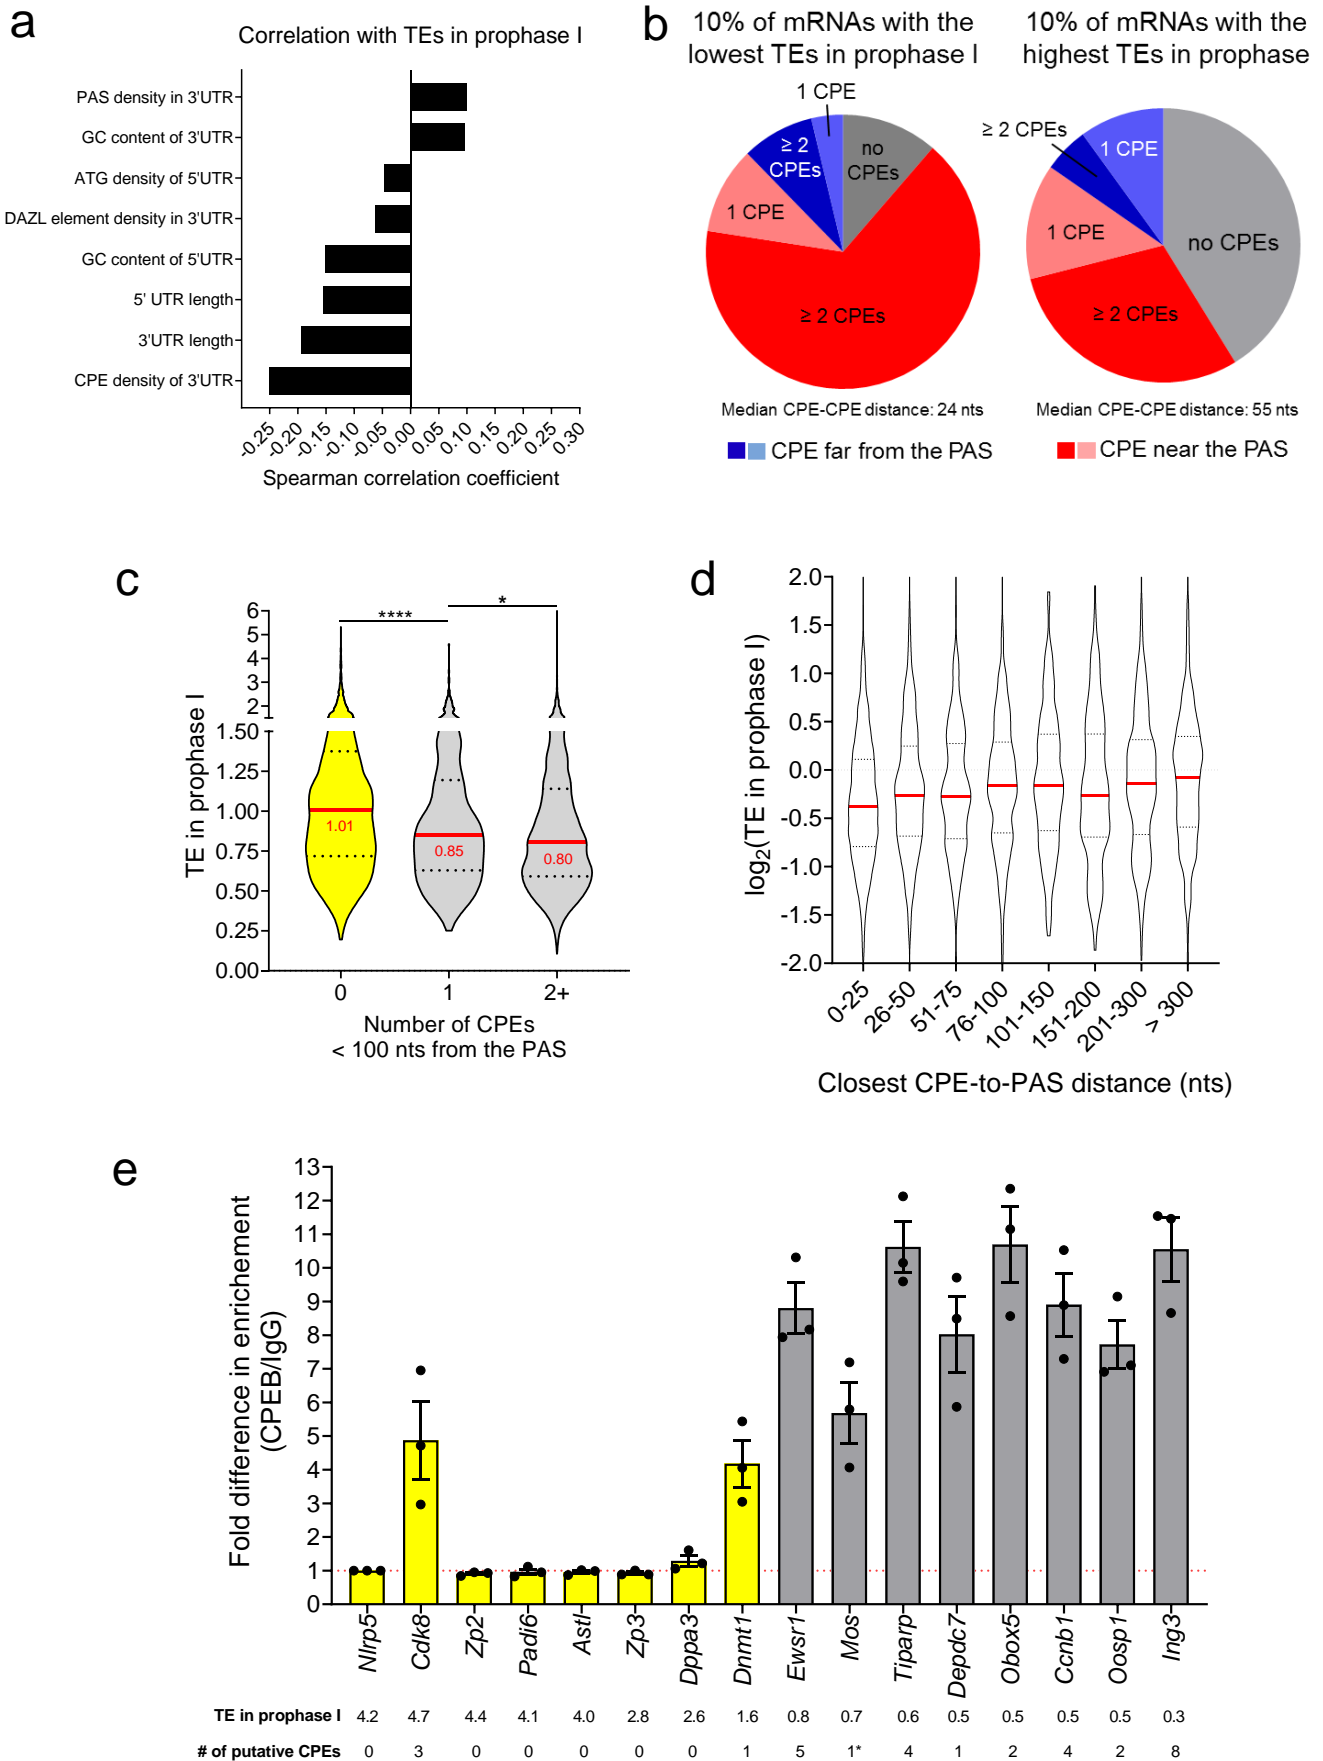

**Fig. 4. Features associated with maternal mRNAs translated with high or low efficiency in GV-arrested oocytes**

**a)** Genome-wide correlation between mRNA features with TE in GV-arrested oocytes. PAS density in the 3'UTR, GC content in the 3' and 5'UTRs, ATG density in the 5'UTR, DAZL and CPEB *cis*-acting element densities in the 3'UTR, and 3'UTR and 5'UTR lengths were calculated as detailed in the "Methods". These data were then correlated with TEs during prophase I arrest and Spearman correlation coefficients were calculated for every comparison;  $p < 0.0001$  for all pairs. In mRNAs with higher TEs, the reduced number of 3'UTR *cis*-acting elements is not due to shorter 3'UTR length, as element number was normalized for 3'UTR length when calculating densities. **b)** Detailed analysis of the relationship between TE in prophase I arrest and presence of CPEs in the 3'UTR of low- and high-TE mRNAs. Pie charts report the percentage of low- or high-TE mRNAs in GV-arrested oocytes where a CPE could be identified. Scanning for CPE in the 3' UTRs was performed as detailed in the "Methods". **c)** Genome-wide relationship between TE and number of CPEs found within 100 nts of the PAS in GV-arrested oocytes. Median values are represented by red lines and the 25 and 75% quartiles are represented by black, dashed lines. Statistical significance was evaluated by unpaired, two-tailed t-tests; \*:  $p = 0.0313$ ; \*\*\*\*  $p < 0.0001$ . **d)** Detailed analysis of the relationship between TE in prophase I arrest and the distance of the closest CPE to the PAS. Median values are represented by red lines and the 25 and 75% quartiles are represented by black, dashed lines. **e)** Enrichment of low-TE mRNAs bound to CPEB1 in GV-arrested oocytes. GV-arrested oocytes were collected and RNA-IP followed by RT-qPCR was performed as described in the "Methods". *Nlrp5* was used as a reference gene as it is known to not bind to CPEB1. Three biological replicates of 200 oocytes per time point were used and RT-qPCR reactions were run in triplicate. Data are presented as fold difference in mRNA levels in CPEB1-IP as compared to the IgG-IP. The bars represent the mean  $\pm$  SEM of three

experiments. TE and the number of putative CPEs for each gene are reported. \*The *Mos* 3'UTR has a single embryonic CPE(Simon and Richter, 1994).

## Figure 5

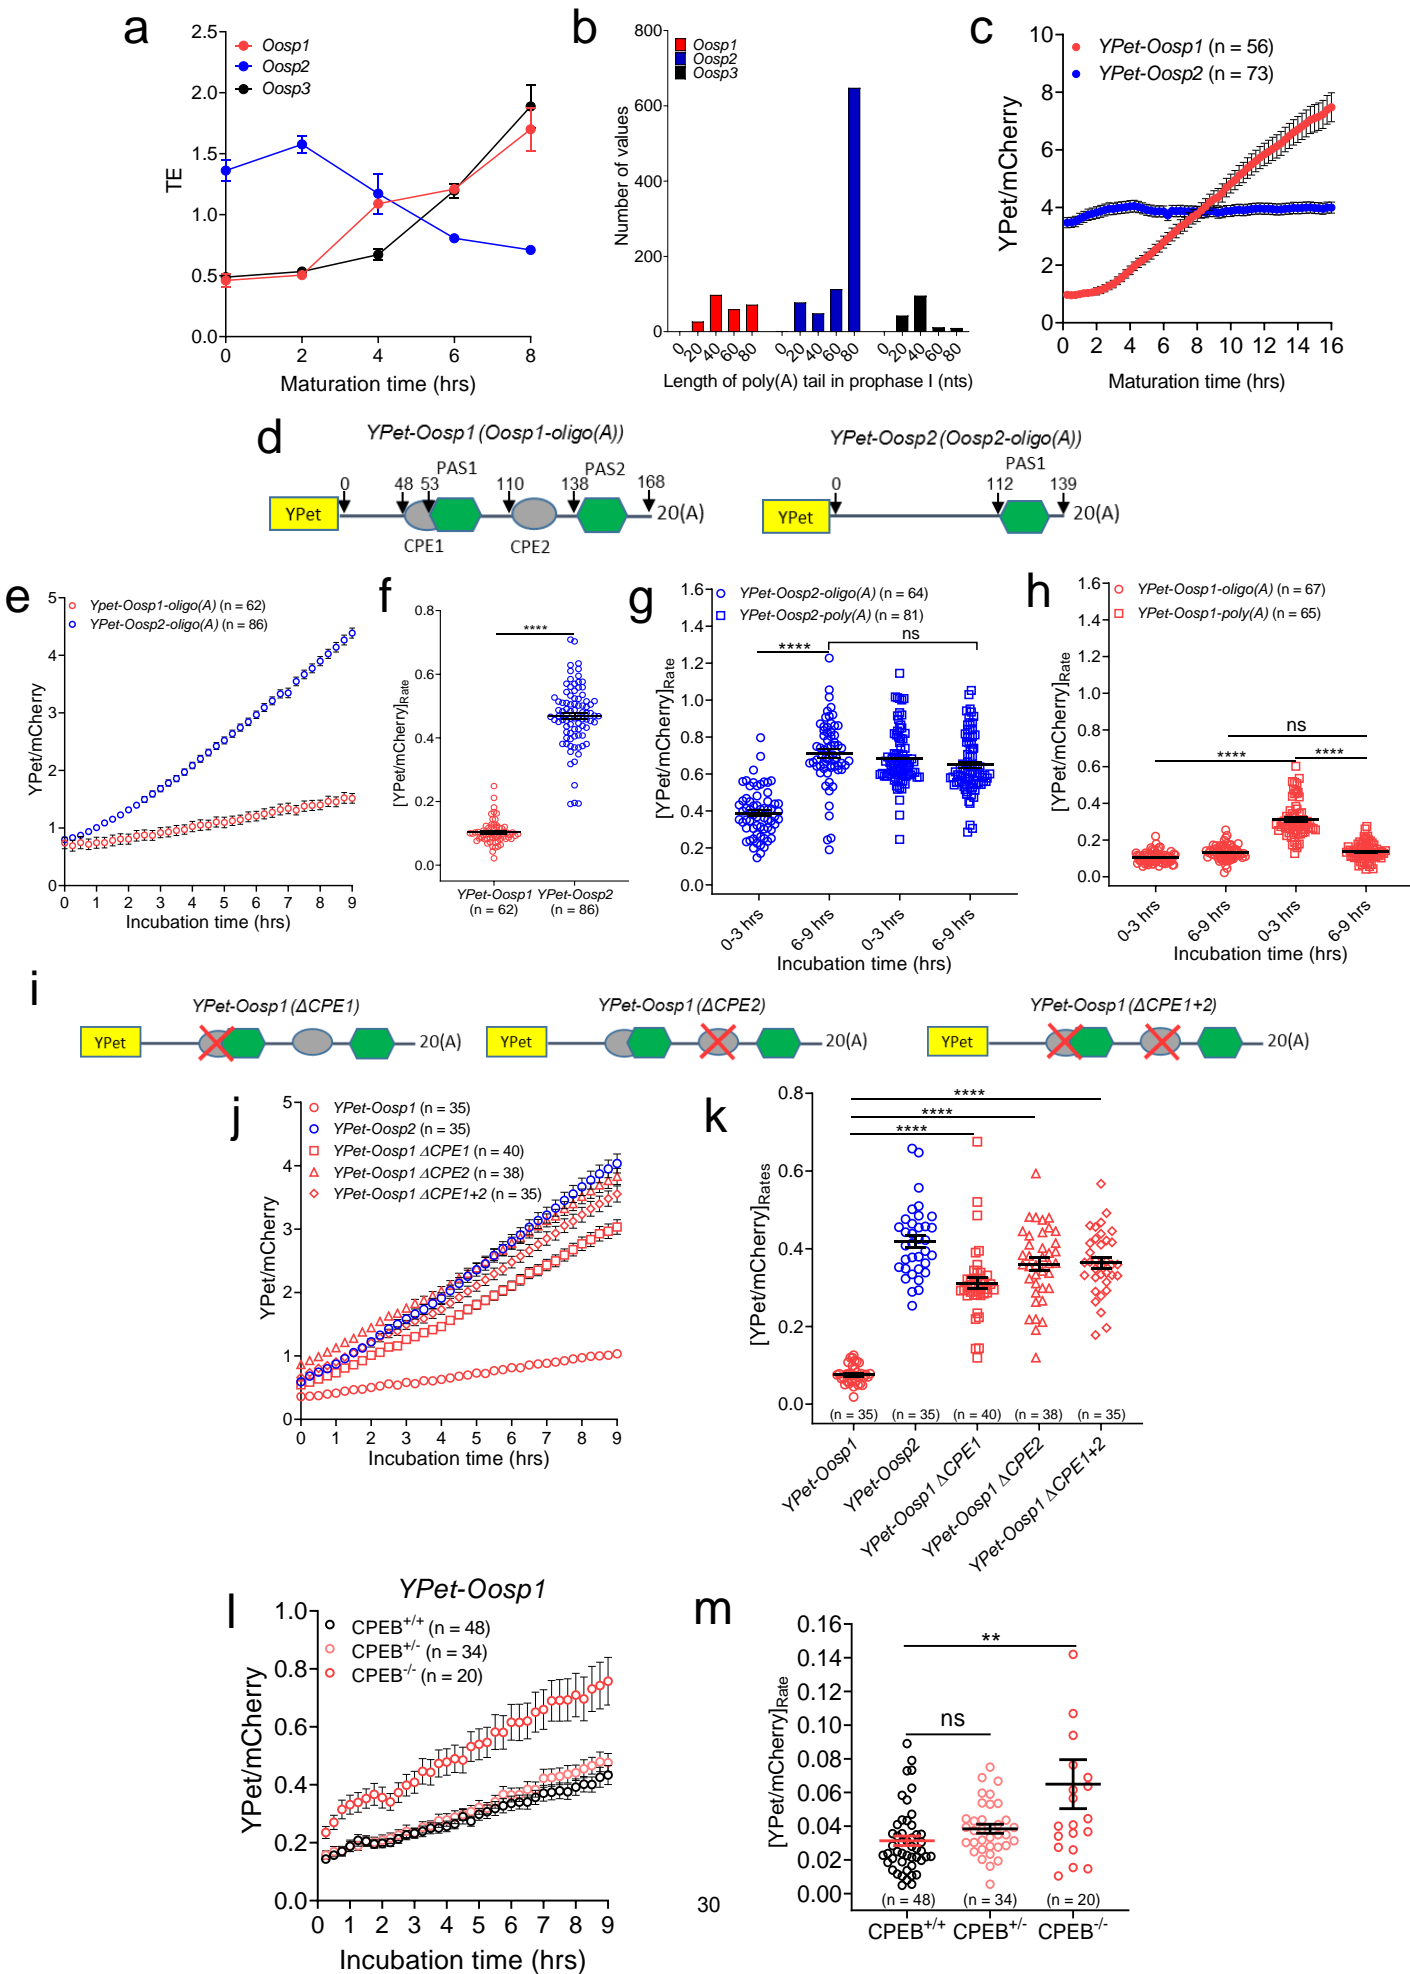

**Fig. 5. The presence of CPEs in the 3'UTR is associated with translational repression in GV-arrested oocytes**

**a)** TE values of members of the *Oosp* cluster during meiosis. The duplicate average and range of TEs are reported. **b)** Polyadenylation state of members of the *Oosp* cluster in GV-arrested oocytes. Data were from a published TAIL-Seq study (Morgan et al., 2017). **c)** Accumulation of YPet reporters for *Oosp1* and *Oosp2* 3'UTRs during meiotic maturation. GV-arrested oocytes were collected and microinjected with oligoadenylated *YPet-Oosp1* (red) or *YPet-Oosp2* (blue) mRNA along with polyadenylated *mCherry* mRNA. Oocytes were allowed to recover for 16 hrs after microinjection, released from cilostamide block, and imaged for 16 hrs with a sampling frequency of 15 mins. Each point is the mean  $\pm$  SEM of individual oocyte traces obtained in three separate experiments. The total number of oocytes analyzed is in parentheses. **d)** YPet reporters for *Oosp1* and *Oosp2* 3'UTRs. 3' UTRs expressed in the oocytes were cloned downstream of the YPet ORF (yellow box). CPEs (grey ovals) and PASEs (green hexagons) are shown along with relevant nucleotide positions relative to the start of the 3'UTR. **e)** Accumulation of *Oosp1* and *Oosp2* 3'UTR YPet reporters in GV-arrested oocytes. GV-arrested oocytes were collected and microinjected with oligoadenylated *YPet-Oosp1* (red) or *YPet-Oosp2* (blue) mRNA along with polyadenylated *mCherry* mRNA. Oocytes were allowed to recover for 2.5 hrs after microinjection, maintained in prophase I, and imaged for 9 hrs with a sampling frequency of 15 mins. Each point is the mean  $\pm$  SEM of individual oocyte traces obtained in three separate experiments. The total number of oocytes analyzed is in parentheses. **f)** Translation rates of the *Oosp1* and *Oosp2* YPet reporters in GV-arrested oocytes. The translation rate for each oocyte was calculated by linear regression of the reporter data (Fig. 5e) between 6 and 9 hrs. Mean  $\pm$  SEM is reported. Statistical significance was evaluated by Mann Whitney test; \*\*\*\*:  $p < 0.0001$ . **g)** Translation rates of oligoadenylated or polyadenylated *Oosp2* 3'UTR YPet reporter in GV-arrested oocytes. GV-arrested oocytes were collected and microinjected with either *YPet-Oosp2-oligo(A)* or *YPet-*

*Oosp2-poly(A)* mRNA along with polyadenylated *mCherry* mRNA. Experimental conditions were as described in Fig. 5e. The translation rate for each oocyte was calculated by linear regression of the reporter data (Supplemental Fig. 4c) between 0 and 3 hrs or 6 and 9 hrs. The data were collected from two independent experiments and the total number of oocytes analyzed and mean  $\pm$  SEM are reported. Statistical significance was evaluated by Kruskal-Wallis test; \*\*\*\*:  $p < 0.0001$  and ns: not significant. **h)** Translation rates of oligoadenylated and polyadenylated *Oosp1* YPet reporters in GV-arrested oocytes. Experimental conditions were as described in Fig. 5e. The data were collected from two independent experiments (Supplemental Fig. 4d) and the total number of oocytes analyzed and mean  $\pm$  SEM are reported. Statistical significance was evaluated by Kruskal-Wallis test; \*\*\*\*:  $p < 0.0001$  and ns: not significant. **i)** Mutations of CPE(s) in the *Oosp1* YPet reporter. We designated the proximal site as CPE1 and the distal as CPE2. CPE1 (TTTTAAATaaa) was mutated to 'CGACAAATaaa,' preserving the downstream, overlapping PAS, while CPE2 (TTTTAAT) was mutated to 'CGACTCC' as previously described (Yang et al., 2017). **j)** Accumulation of wild type *Oosp1*, wild type *Oosp2*, and mutant *Oosp1* reporters in GV-arrested oocytes. GV-arrested oocytes were collected and microinjected with oligoadenylated YPet-*Oosp1* (red circle), YPet-*Oosp2* (blue circle), YPet-*Oosp1*( $\Delta$ CPE1) (red square), YPet-*Oosp1*( $\Delta$ CPE2) (red triangle), or YPet-*Oosp1*( $\Delta$ CPE1+2) (red diamond) mRNA along with polyadenylated *mCherry* mRNA. Experimental conditions were as described in Fig. 5e. Each point is the mean  $\pm$  SEM of individual oocyte traces obtained in two separate experiments. The total number of oocytes analyzed is in parentheses. **k)** Translation rates of wild type *Oosp1*, wild type *Oosp2*, and mutant *Oosp1* reporters in GV-arrested oocytes. The translation rate for each oocyte was calculated by linear regression of the reporter data (Fig. 5j) between 6 and 9 hrs. Mean  $\pm$  SEM is reported. Statistical significance was evaluated by Kruskal-Wallis test; \*\*\*\*:  $p < 0.0001$  and ns: not significant. **l)** Accumulation of YPet-*Oosp1* in GV-arrested CPEB1<sup>+/+</sup>, CPEB1<sup>+/-</sup>, and CPEB1<sup>-/-</sup> oocytes. Oocytes were collected from hormone-primed wild type, *Zp3-Cre<sup>T</sup> Cpeb1<sup>F/+</sup>*, and *Zp3-Cre<sup>T</sup> Cpeb1<sup>F/F</sup>* mice. Experimental conditions were as described in Fig. 5e. Each point is



the mean  $\pm$  SEM of individual oocyte traces obtained in two separate experiments. The total number of oocytes analyzed is in parentheses. **m)** Translation rates of *YPet-Oosp1* in GV-arrested CPEB1<sup>+/+</sup>, CPEB1<sup>+/-</sup>, and CPEB1<sup>-/-</sup> oocytes. The translation rate for each oocyte was calculated by linear regression of the reporter data (Fig. 5l) between 6 and 9 hrs. Mean  $\pm$  SEM is reported. Statistical significance was evaluated by Kruskal-Wallis test; \*\*:  $p = 0.0043$  and ns: not significant.

## Figure 6

**a**

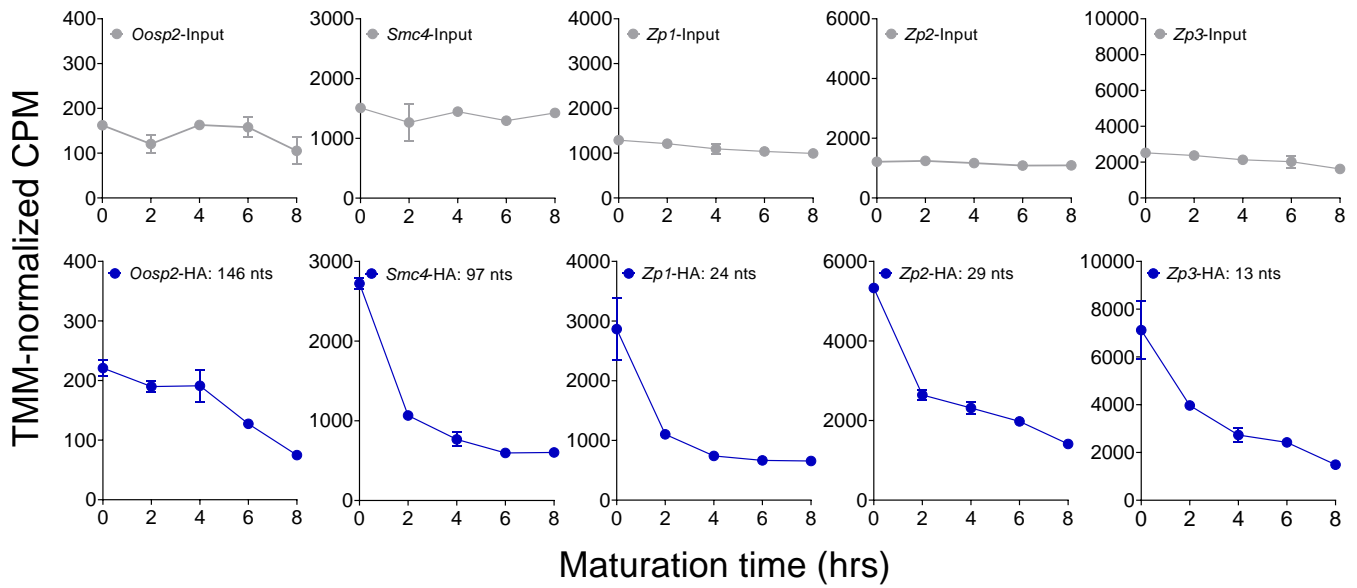

**b**

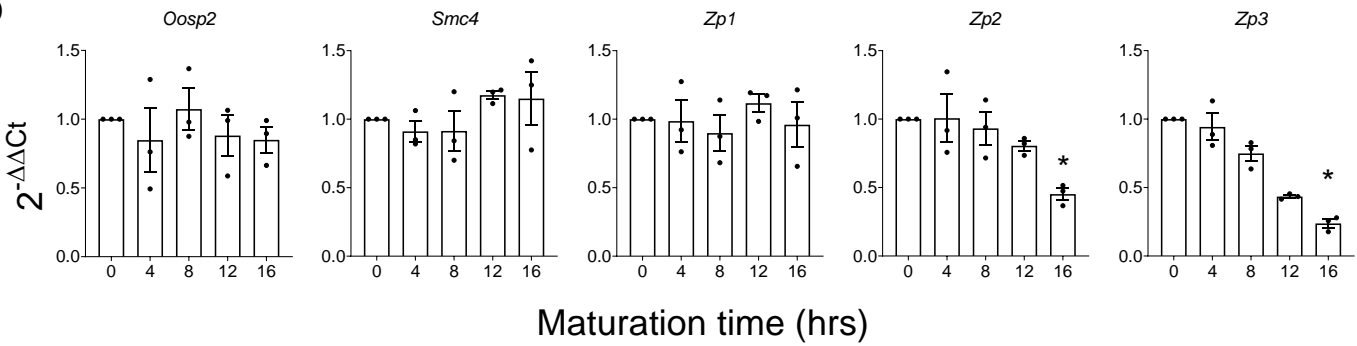

**c**

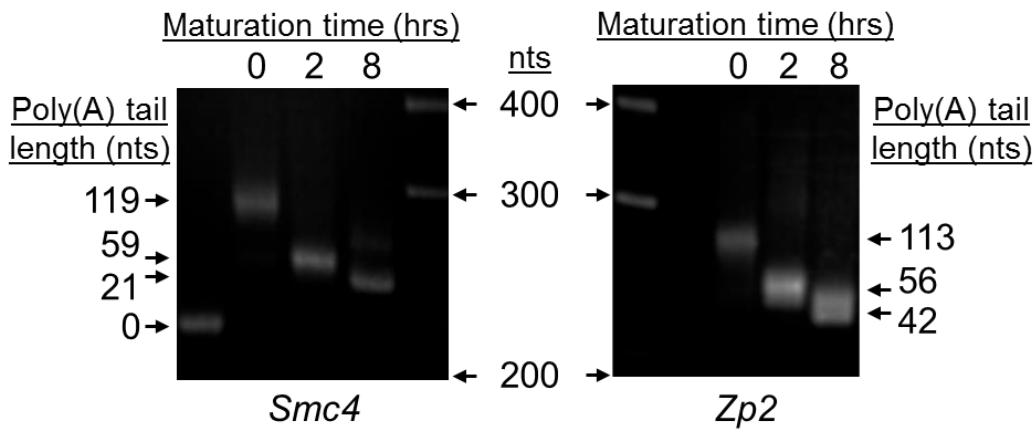

**Fig. 6. Translational repression during oocyte reentry into the cell cycle is dissociated from destabilization and requires de-adenylation**

**a)** Time course of ribosome loading onto repressed candidate mRNAs (DOWN) during meiotic maturation. Values are from our RiboTag/RNA-Seq dataset and the mean and range of duplicate biological replicates are plotted. **b)** Translational repression of endogenous mRNAs is dissociated from destabilization. Oocytes were matured *in vitro* up to MII and samples were collected at different times during maturation. RNA was extracted from the oocytes, reverse transcribed, and used for RT-qPCR. *Bcl2l10* was used as a reference gene as its levels are known to be stable during this time. Data are represented as fold changes in mRNA levels as compared to 0 hrs. Three biological replicates of 30 oocytes per time point were used and RT-qPCR reactions were run in triplicate. The bars represent the mean  $\pm$  SEM of three experiments. Statistical significance was evaluated by Friedman tests; \*:  $p < 0.05$ . **c)** Translational repression of endogenous *Smc4* and *Zp2* is associated with message de-adenylation. Oocytes were either maintained in prophase I arrest (0 hrs) or allowed to mature for 2 or 8 hrs. At the end of the incubation, RNA was extracted and used for PAT assays with anchored oligo-dT primers. A representative experiment of the three performed is reported.

## Figure 7

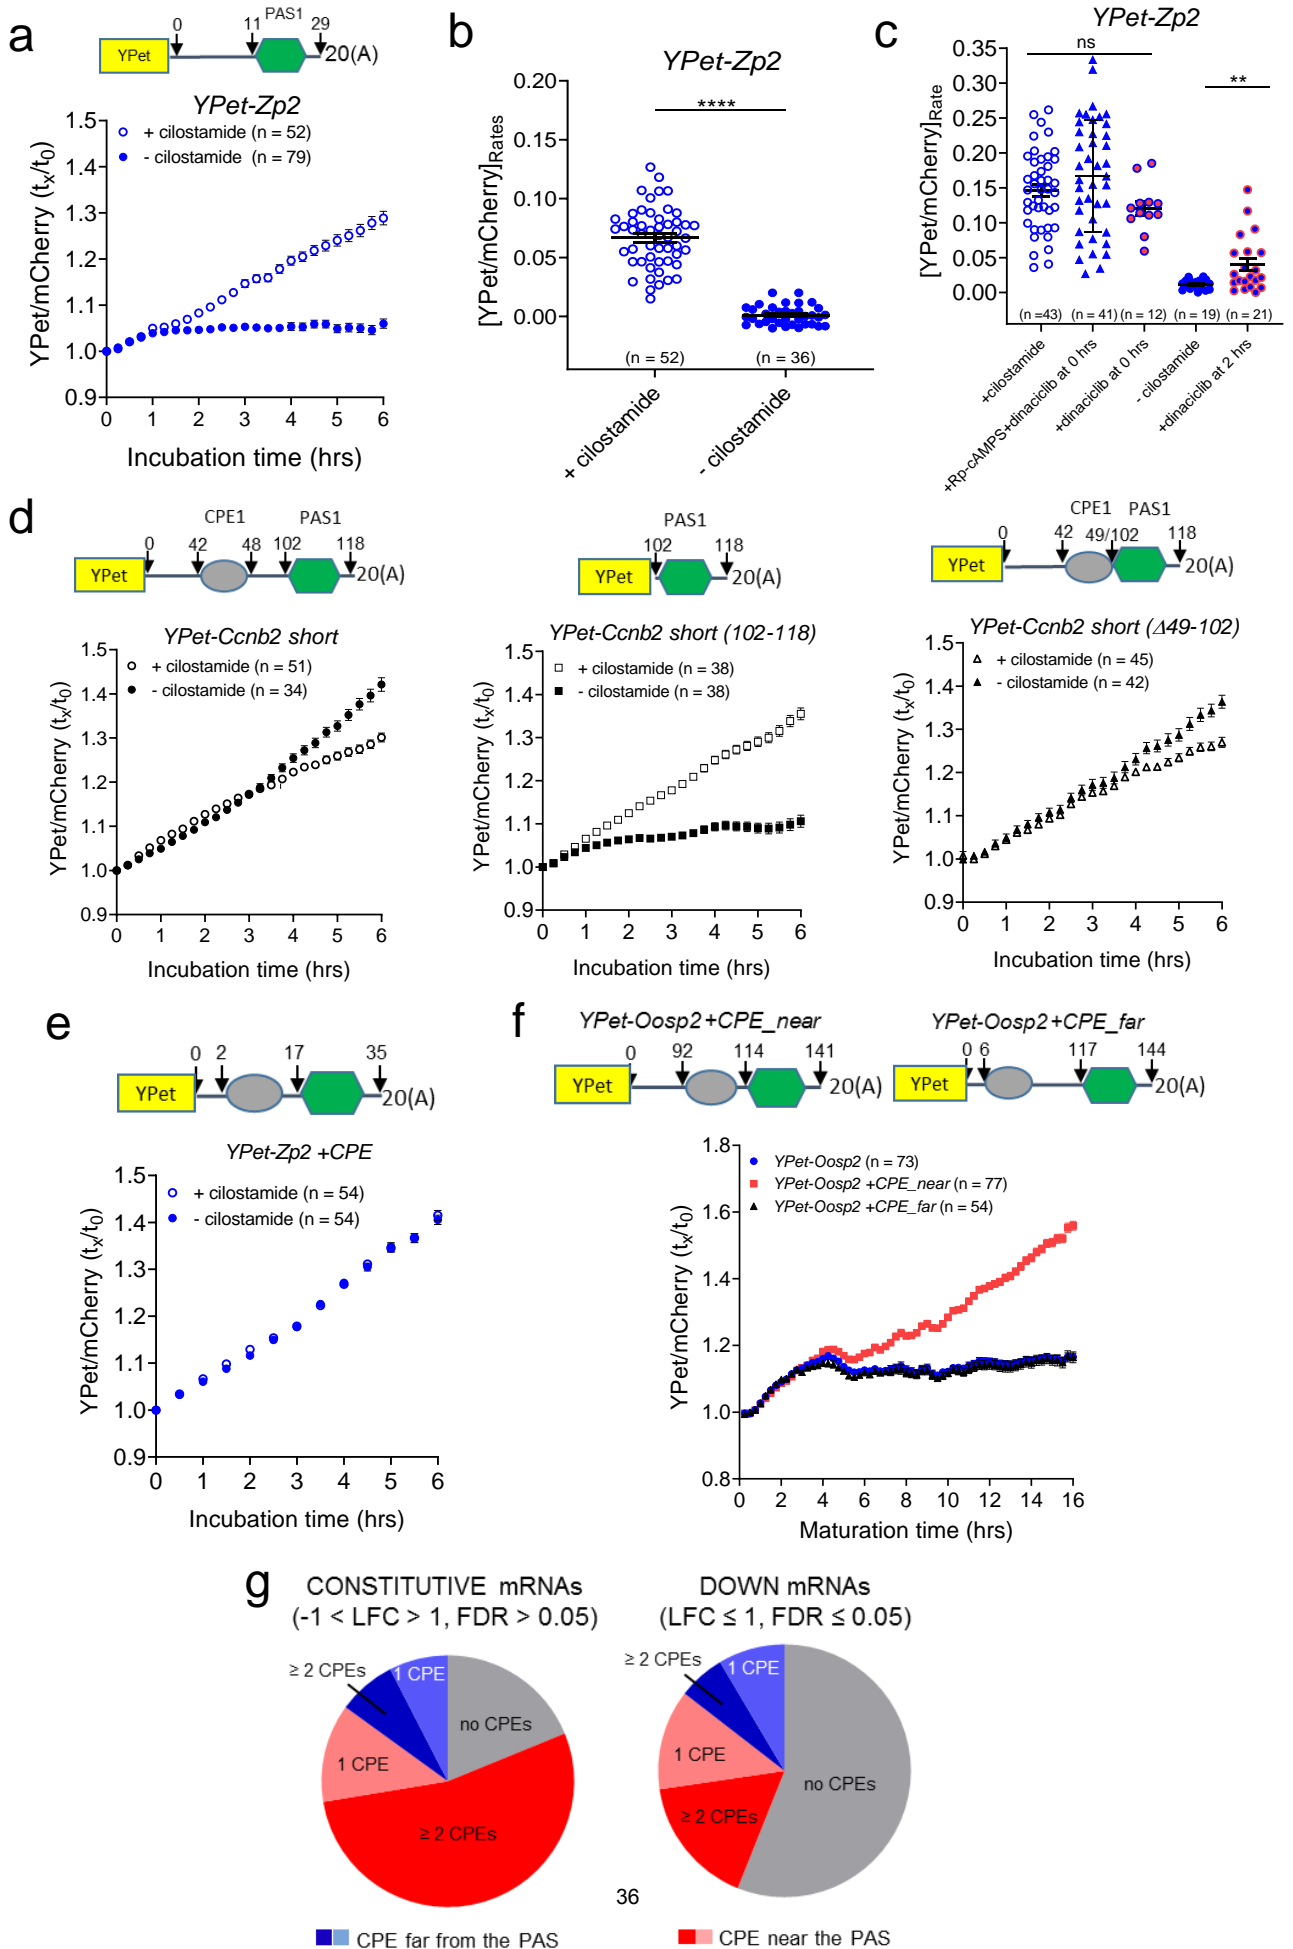

**Fig. 7 Translational repression during meiotic maturation is recapitulated by the 3'UTR of DOWN mRNAs, requires CDK1 activation, and is prevented by the presence of a CPE in close proximity to the PAS**

**a)** The 3' UTR of *Zp2* (high-TE in prophase I and DOWN transcript) recapitulates the rapid translation repression post-GVBD. Oocytes were injected with an oligoadenylated *YPet-Zp2* mRNA together with a polyadenylated *mCherry* mRNA. Oocytes were then either maintained in prophase I arrest with cilostamide treatment (empty circles) or allowed to mature (solid circles) and imaged for 10 hrs with a sampling frequency of 30 mins. Data are reported as the fold change of the YPet/mCherry ratios as compared to 0 hrs. Each point is the mean  $\pm$  SEM of individual oocyte traces obtained in two separate experiments. The total number of oocytes analyzed is in parentheses. **b)** Translation rates of the *YPet-Zp2* reporter in GV-arrested or maturing oocytes. The translation rate for each oocyte was calculated by linear regression of the reporter data (Fig. 7a) between 3 and 6 hrs. Mean  $\pm$  SEM are reported. Statistical significance was evaluated by unpaired, two-tailed t-test; \*\*\*\*:  $p < 0.0001$ . **c)** Translation repression of the *YPet-Zp2* reporter during meiosis resumption requires GVBD and CDK1 activation but not PKA activity. After microinjection of the *YPet-Zp2* reporter, oocytes were released in cilostamide-free medium and incubated with a CDK1 inhibitor (5  $\mu$ M dinaciclib) or a combination of CDK1 and PKA inhibitors (Rp-cAMPS) from the time of release (0 hrs). The translation rate for each oocyte was calculated by linear regression of the reporter data between 3 and 6 hrs. In another group, dinaciclib was added after GVBD at 2 hrs into incubation. Statistical significance was evaluated by unpaired, two-tailed t-tests; ns: not significant; \*\*:  $p = 0.0053$ . **d)** Deletion mutagenesis of the *Ccnb2* 3'UTR. GV-arrested oocytes were collected, microinjected with oligoadenylated *YPet-CcnB2 short* or reporters fused to the *Ccnb2* 3'UTRs with progressive deletions along with a polyadenylated *mCherry* reporter. Sixteen hrs after microinjection, oocytes were either maintained in prophase I arrest with cilostamide (empty circles) or allowed to mature (solid circles) and imaged for 6 hrs

with a sampling frequency of 15 mins. Data are reported as the fold change of the YPet/mCherry ratios as compared to 0 hrs. Each point is the mean  $\pm$  SEM of individual oocyte traces obtained in two separate experiments. The total number of oocytes analyzed is in parentheses. **e)** Insertion of a CPE in the 3' UTR of *Zp2* (DOWN), prevents repression during meiotic maturation. GV-arrested oocytes were collected, microinjected with oligoadenylated *YPet-Zp2 +CPE* mRNA together with a polyadenylated *mCherry* mRNA. Experimental conditions were as described in Fig. 7a. Data are reported as the fold change of the YPet/mCherry ratios as compared to 0 hrs. Each point is the mean  $\pm$  SEM of individual oocyte traces obtained in two separate experiments. The total number of oocytes analyzed is in parentheses. **f)** Insertion of a CPE in close proximity of the PAS in the *Oosp2* 3'UTR prevents translational repression during meiotic maturation. GV-arrested oocytes were collected, microinjected with oligoadenylated *YPet-Oosp2* or a reporter with a CPE inserted in the *Oosp2* 3'UTR along with a polyadenylated *mCherry* reporter. Oocytes were incubated for 16 hrs after microinjection, allowed to mature, and imaged for 16 hrs with a sampling frequency of 15 mins. Data are reported as the fold change of the YPet/mCherry ratios as compared to 0 hrs. Each point is the mean  $\pm$  SEM of individual oocyte traces obtained in three separate experiments. The total number of oocytes analyzed is in parentheses. **g)** Detailed analysis of the relationship between translation patterns during meiotic resumption and the presence of CPEs in the 3'UTR. Pie charts report the percentage of CONSTUTIVE or DOWN mRNAs in GV-arrested oocytes that have or lack CPEs in the 3'UTR.

## Figure 8

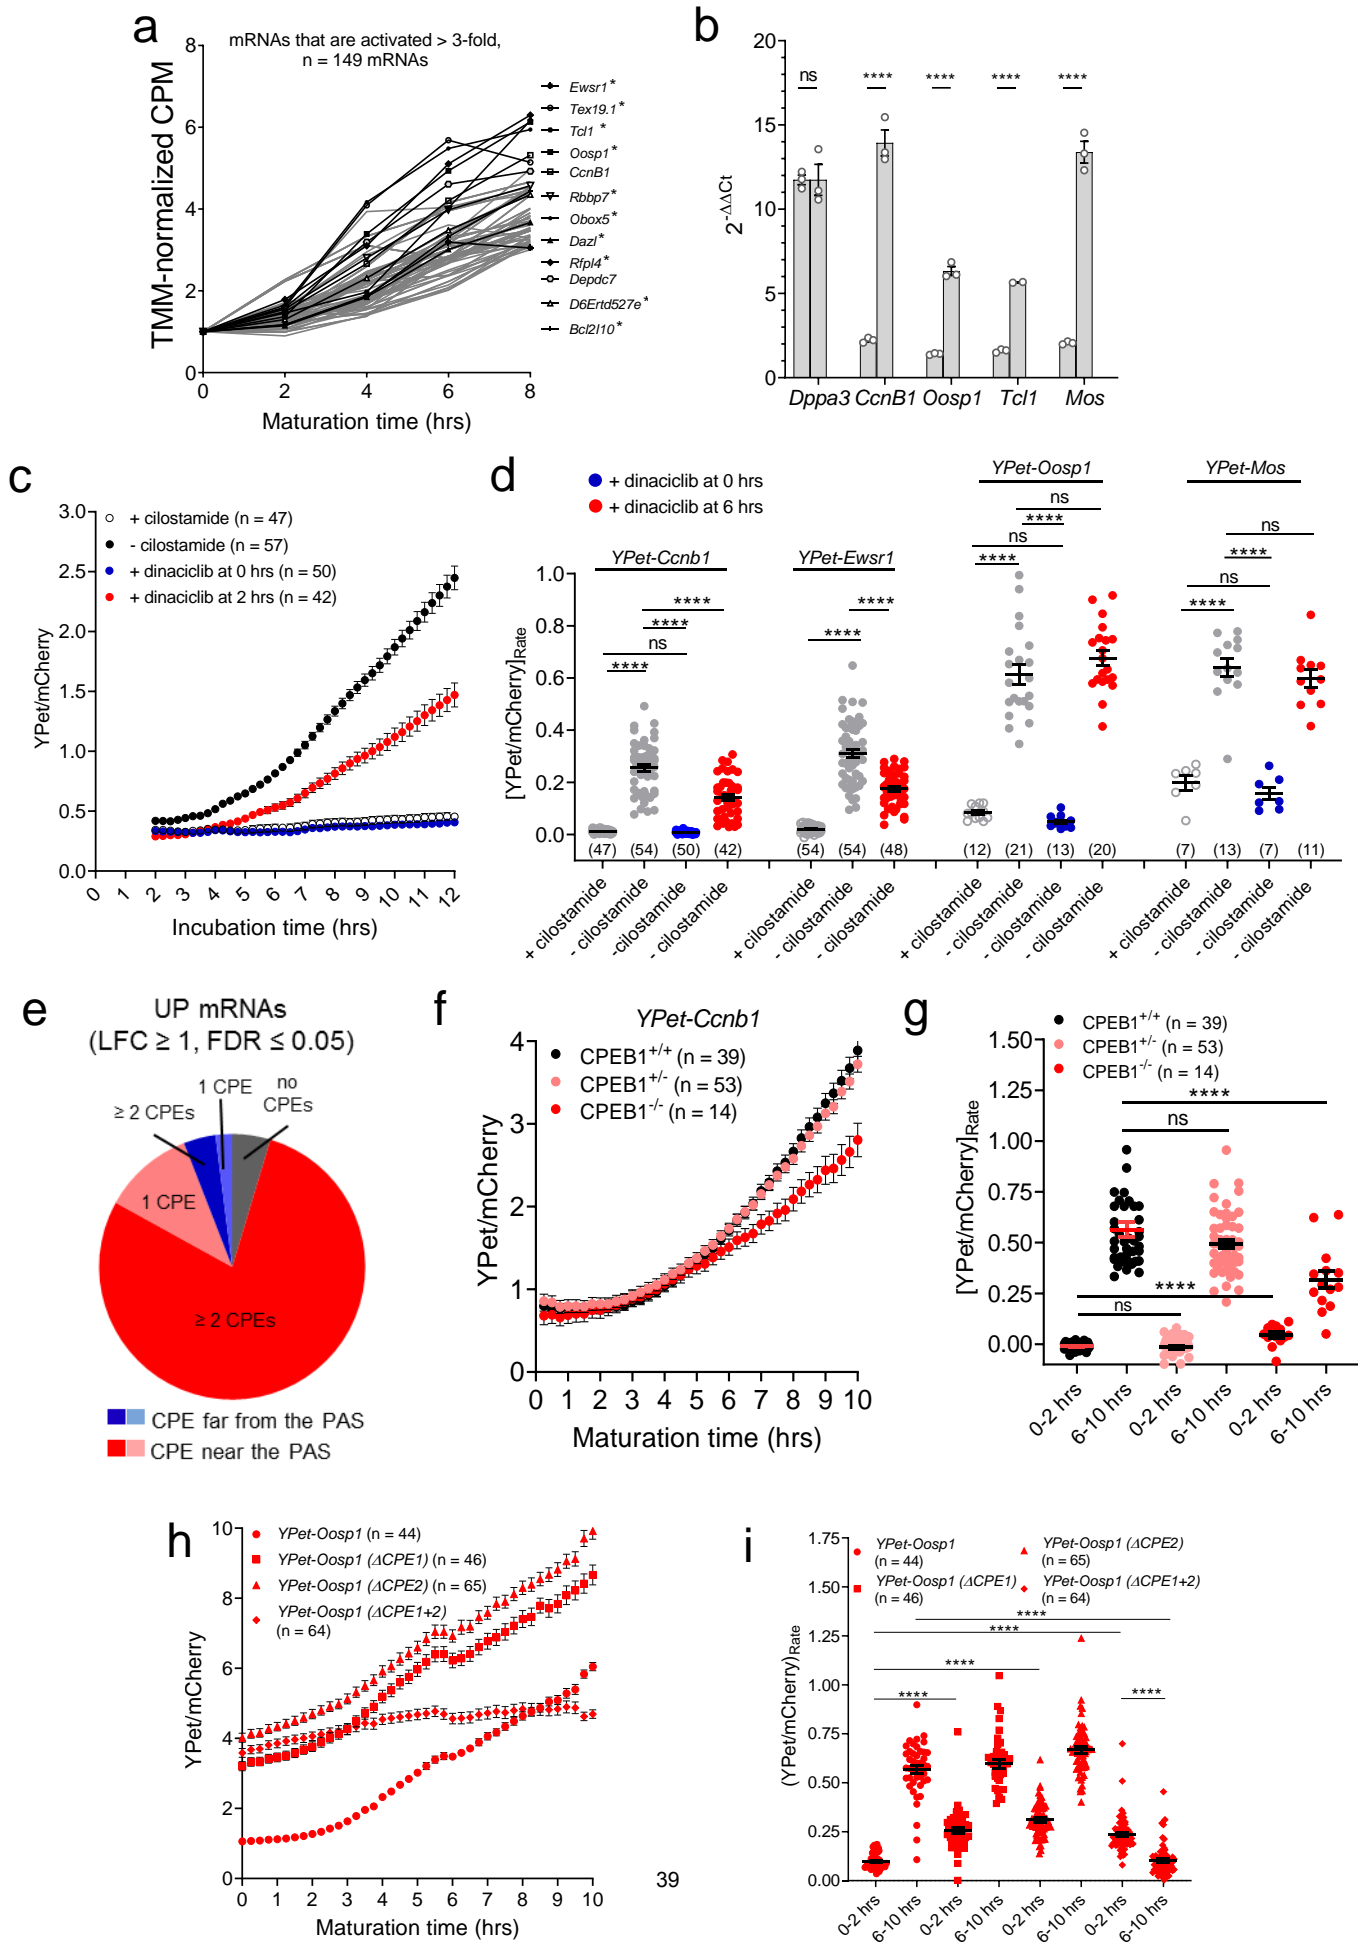

**Fig. 8 CPEB binding to mRNAs activated during maturation is necessary, but not sufficient, for full translational activation**

**a)** Pattern of ribosome loading onto UP mRNAs during meiotic maturation. mRNAs whose translation increased by at least three-fold from prophase I to late MI in our RiboTag/RNA-Seq dataset are shown. Traces of the 149 mRNAs with the highest activation are in grey and transcripts recovered in the pellet of RNA-IP/RT-qPCR with CPEB1 are in black. \* denotes transcripts that are also immunoprecipitated by DAZL antibodies (data under review). **b)** RiboTag-IP/RT-qPCR validation of ribosome loading for selected UP candidates. *Zp3-Cre<sup>T</sup> RiboTag<sup>F/F</sup>* mice were hormone primed and the oocytes isolated. Oocytes were either maintained in prophase I or matured *in vitro* for 8 hrs and collected for downstream RiboTag-IP/RT-qPCR analysis. We quantified several candidates with some of the greatest fold changes in ribosome loading from prophase to late MI. *Dppa3* was used as a reference gene as it is known to be constitutively translated during this time. Data are represented as fold changes in message levels as compared to 0 hrs. Three biological replicates of 200 oocytes per time point were used and RT-qPCR reactions were run in triplicate. The bars represent the mean  $\pm$  SEM of three experiments. Statistical significance was evaluated by unpaired, two-tailed t-tests; \*\*\*\*:  $p < 0.0001$ . **c)** The effect of CDK1 inhibition on the translation of *CcnB1* (UP). GV-arrested oocytes were collected and microinjected with oligoadenylated *YPet-CcnB1* 3'UTR mRNA along with polyadenylated *mCherry* mRNA. Oocytes were incubated for 16 hrs then two groups of oocytes were maintained in prophase I arrest with either cilostamide (empty, black circle) or dinaciclib without cilostamide (blue circle). Another two groups of oocytes were either matured without (solid, black circle) or with dinaciclib added at 2 hrs after release (red circle). Imaging started 2 hrs after cilostamide release and lasted for 10 hrs with a sampling frequency of 15 mins. Each point is the mean  $\pm$  SEM of individual oocyte traces obtained in three separate experiments. The total number of oocytes analyzed is in parentheses. **d)** Translation rates of *YPet-CcnB1* and *YPet-Ewsr1* are



affected by CDK1 inhibition during meiotic maturation. The translation rate for each oocyte was calculated by linear regression of the reporter data (Fig. 8c and Supplementary Fig. 13a-c) between 8 and 12 hrs. Mean  $\pm$  SEM is reported. Statistical significance was evaluated by Kruskal-Wallis test; ns: not significant; \*\*\*\*:  $p < 0.0001$ . **e)** Detailed analysis of the relationship between mRNAs that are translationally activated during meiotic resumption and the presence of CPEs in the 3'UTR. Pie charts report the percentage of UP mRNAs in GV-arrested oocytes that have or lack CPEs in the 3'UTR. **f)** CPEB1 is required for efficient translational activation of *CcnB1*. CPEB1<sup>+/+</sup> (black), CPEB1<sup>+/-</sup> (light red), and CPEB1<sup>-/-</sup> (red) oocytes were collected, maintained in prophase I arrest, and microinjected with oligoadenylated *YPet-CcnB1* mRNA along with polyadenylated *mCherry* mRNA. After 2.5 hrs incubation, oocytes were matured and imaged for 10 hrs with a sampling frequency of 15 mins. Each point is the mean  $\pm$  SEM of individual oocyte traces obtained in two separate experiments. The total number of oocytes analyzed is in parentheses. **g)** Translation rates of the *YPet-CcnB1* reporter during oocyte maturation in CPEB1<sup>+/+</sup>, CPEB1<sup>+/-</sup>, and CPEB1<sup>-/-</sup> oocytes. The translation rate for each oocyte was calculated by linear regression of the reporter data (Fig. 8f) between 0 and 2 hrs or 6 and 10 hrs. Mean  $\pm$  SEM is reported. Statistical significance was evaluated by Kruskal-Wallis test; ns: not significant; \*\*\*\*:  $p < 0.0001$ . **h)** Accumulation of wild type *Oosp1* and mutant *Oosp1* YPet reporters during meiotic maturation. GV-arrested oocytes were collected and microinjected with oligoadenylated *YPet-Oosp1* (circle), *YPet-Oosp1( $\Delta$ CPE1)* (square), *YPet-Oosp1( $\Delta$ CPE2)* (triangle), or *YPet-Oosp1( $\Delta$ CPE1+2)* (diamond) mRNA along with polyadenylated *mCherry* mRNA. After 16 hrs of recovery after microinjection, oocytes were allowed to mature, and imaged for 10 hrs with a sampling frequency of 15 mins. Each point is the mean  $\pm$  SEM of individual oocyte traces obtained in two separate experiments. The total number of oocytes analyzed is in parentheses. **i)** Translation rates of wild type *Oosp1* and mutant *Oosp1* YPet reporters during meiotic maturation. The translation rate for each oocyte was calculated by linear regression of the reporter data (Fig.

8f) between 0 and 2 hrs or 6 and 10 hrs (post-GVBD). Mean  $\pm$  SEM is reported. Statistical significance was evaluated by Kruskal-Wallis test; ns: not significant; \*\*\*\*:  $p < 0.0001$ .

## Methods

### Animals

All experimental procedures involving mice were approved by the University of California, San Francisco Institutional Animal Care and Use Committee (Approval #AN101432). Animal care and use were performed according to relevant guidelines and regulations. All animals used were of the C57BL/6J inbred strain. C57BL/6-Zp3cre-Rpl22tm1.1Psam (*Zp3-Cre<sup>T</sup> RiboTag*) mice were obtained from Jackson Laboratories and bred as previously described (Martins et al., 2016). CPEB1-targeted mice were a gift from Raúl Méndez and colleagues (Calderone et al., 2016) and bred in our laboratory.

### Oocyte isolation and culture

Three-week old female mice were injected with 5 I.U. PMSG to induce superovulation. Forty-four hrs after injection, the mice were euthanized and the ovaries dissected into media containing HEPES and 1  $\mu$ M cilostamide (Millipore, 231085) (HC media). The antral follicles were punctured, allowing release of cumulus-oocyte complexes (COCs). Repeated aspiration through a glass pipette allowed for removal of the surrounding cumulus cells. Denuded oocytes were maintained at prophase I arrest in MEM Alpha (Gibco, 12561-056) supplemented with sodium pyruvate (Gibco, 11360070) and penicillin-streptomycin (Gibco, 15140122) in addition to 1  $\mu$ M cilostamide ( $\alpha$ C media) at 37°C under 5% CO<sub>2</sub>. If indicated, oocytes were transferred to cilostamide-free MEM Alpha ( $\alpha$  media), allowed to mature, and collected at various time points. Where specified, oocytes were treated with 5  $\mu$ M dinaciclib (Selleckchem, SCH727965) or 10 mM Rp-cAMPS.

### Immunofluorescence staining and confocal microscopy

Oocytes were collected at various time points and fixed in DPBS (GE Healthcare, SH30264.02) supplemented with 0.1% Triton X-100 (Sigma, X-100) and 2% formaldehyde (ThermoFisher, 28908) for 30 mins. After washing in blocking buffer (1x DPBS, 0.3% BSA, and 0.01% Tween), the oocytes were incubated in blocking buffer for 16 hrs and permeabilized for 15 mins in DPBS supplemented with 0.3% BSA and 0.1% Triton X-100. Samples were washed and then incubated for 1 hr with primary antibody diluted in blocking buffer. The antibodies used were: 1:100  $\beta$ -tubulin (9F3) rabbit mAb (Cell Signaling Technology, 3623); 1:200 human antibody against centromere (ImmunoVision, HCT-0100). After another round of washing, samples were incubated for 1 hr with the corresponding secondary antibody, goat anti-rabbit IgG, Alexa Fluor 488 (ThermoFisher, A-11008) or 1:500 goat anti-human IgG, Alexa Fluor 568 (ThermoFisher, A-21090). Oocytes were washed again and then mounted with VECTASHIELD® Antifade Mounting Medium with DAPI (Vector, H-1200). All washes were done three times each round in blocking buffer for 10 mins each wash. Images were captured with a confocal Nikon C1SI equipped with X60 oil immersion lens and processed with ImageJ (Rueden et al., 2017).

### **RiboTag-immunoprecipitation (RiboTag-IP)**

Only *Zp3-Cre<sup>T</sup> RiboTag<sup>F/F</sup>* female mice used for RiboTag-immunoprecipitation. Oocytes were collected in 5  $\mu$ l 0.1% polyvinylpyrrolidone (PVP; Sigma, P0930) in 1x PBS (Invitrogen, AM9625), flash frozen in liquid nitrogen, and stored at -80°C.

The appropriate volume (50  $\mu$ l per sample) of Dynabeads™ Protein G (Invitrogen, 10004D) was washed three times in 500  $\mu$ l homogenization buffer (HB: 50 mM Tris HCl pH 7.4, 100 mM KCl, 12 mM MgCl<sub>2</sub>, and 1% NP-40) on a rotor at 4°C for 5 mins per wash. Two additional washes were performed with 500  $\mu$ l sHB on a rotor at 4°C for 10 mins per wash. The final wash solution was removed and the beads were eluted in the original volume of HB supplemented (sHB) with 1mM DTT, 1x protease inhibitors, 200 units/ml RNaseOUT, 100  $\mu$ g/ml cycloheximide,

and 1mg/ml heparin. Samples were thawed, randomly pooled to yield a total of 200 oocytes per time point per replicate, and 300  $\mu$ l of sHB was added to each pooled sample. To lyse the cells, samples were vortexed for 30 secs, flash frozen in liquid nitrogen, and thawed at room temperature (RT); this process was repeated twice. Finally, the homogenates were centrifuged for 10 mins at maximum speed and 4°C and the supernatants were transferred to new tubes. To pre-clear the samples, 20  $\mu$ l washed beads was added to each supernatants and samples were incubated on a rotor at 4°C for 1 hr. A magnetic rack was used to remove the beads and 15  $\mu$ l of each pre-cleared lysate was collected and added to 200  $\mu$ l RLT buffer per sample (Qiagen, 74034) to serve as the input samples. The input samples were frozen and kept at -80°C until RNA extraction. Three  $\mu$ l (3  $\mu$ g) anti-HA.11 epitope tag antibody (BioLegend, 901501) was added to each of the extracts and all samples were incubated on a rotor at 4°C for 4 hrs. Thirty  $\mu$ l washed beads was then added to the samples and incubated overnight on a rotor at 4°C. The beads (now bound by HA-tagged ribosomes and the associated mRNAs) were washed 5 times in 1 ml of urea wash buffer (uWB: 50 mM Tris HCl pH 7.4, 150 mM KCl, 12 mM MgCl<sub>2</sub>, 1% NP-40, 1x protease inhibitors, 1 mM DTT, 40 U RNaseOUT, 1 mg/ml heparin, 100  $\mu$ g/ml cycloheximide, and 1 M urea) on a rotor at 4°C for 10 mins per wash. The beads were then pelleted via a magnetic rack and the uWB removed. Two-hundred and fifty  $\mu$ l RLT buffer was added to each sample and the samples were vortexed for 30 seconds. RNA extraction was performed following the Rneasy Plus Micro Kit protocol (Qiagen, 74034). Samples were eluted in 10  $\mu$ l of RNase-free water and used downstream for RNA-Seq or RT-qPCR analysis.

## **RNA-Seq**

### *RNA sequencing*

RNA samples were sent to the Gladstone Institutes Genomics Core for quality control using Bioanalyzer (Agilent) and cDNA library preparation. Samples were sequenced using the HiSeq 4000 system (Illumina).

#### *Sequence quality assessment and trimming*

The quality of the raw sequence data was checked via FASTQC. The sequence files were then trimmed using tools in Trimmomatic-0.36 (Bolger et al., 2014). The following were removed: Illumina TruSeq3 single-ended adapter sequences, bases with a quality score lower than 3 at the start and end of a read, bases that had an average quality per base of below 15 calculated using a sliding window to average four bases, and any reads that were shorter than 36 bases. Input reads were single-ended and input qualities were ASCII characters equal to the Phred quality plus 33.

#### *Mapping and counting reads*

HiSat2 (Kim et al., 2015) was used to build indexes from the Reference Consortium Mouse Build 38 (mm10) and to align sequence reads to the genome. The resulting .bam files were sorted and indexed with SAMtools (Li et al., 2009). Count files for each group were created with HTSeq using the Mouse GENCODE Gene set release M11. The input data were .bam files, the data were not from a strand-specific assay, and the feature type used was 'gene.'

#### *Differential expression (DE) analysis*

The Bioconductor packages edgeR (Robinson et al., 2010) and limma (Ritchie et al., 2015) were used for statistical analyses. Only reads with greater or equal to 10 counts per million (CPM) in at least 2 samples were kept. Trimmed mean of M-values (TMM) normalization, which accounts for compositional differences among the libraries, was then performed on HA reads and input reads, separately. Using the raw counts, dispersion, and design matrix, the negative binomial

generalized linear model was fitted for each gene. Finally, pairwise likelihood ratio tests for 2, 4, 6, and 8 hrs versus 0 hrs were conducted.

### *Gene ontology (GO) analysis*

Gene lists were uploaded to DAVID 6.8(Huang et al., 2009a, b) and processed with the Functional Annotation Tool.

### *Analysis of 3'UTR sequences*

The 3'UTR sequences of the genes of interest (including known mRNA isoforms) were downloaded using the Table Browser (UCSC Genes track) provided by GBSHape(Chiu et al., 2015). The locations of putative PAS (AATAAA, ATTAAA, and AAGAAA)(Beaudoing et al., 2000) and CPE (TTTTAT, TTTTAAAT, TTTTACT, TTTTAAAT, TTTTAAGT, and TTTTCAT)(Pique et al., 2008) sequences were determined via the Find Individual Motif Occurrences (FIMO) tool(Grant et al., 2011), which is part of the MEME Suite(Bailey et al., 2009); only exact matches were used for downstream analysis. Python scripts were written to calculate the distance of each CPE from each PAS for individual 3'UTRs.

### *Data visualization*

ggplot2(Wickham, 2009) was used to create the multi-dimensional scaling (MDS) plots, which are used to visualize sample-to-sample distances, and translation activation and repression time course plots. All other graphs were plotted using GraphPad Prism 8.

### **RNA immunoprecipitation (RNA-IP)**

The appropriate volume (50  $\mu$ l per sample) of Dynabeads™ Protein G (Invitrogen, 10004D) was washed twice in 250  $\mu$ l incomplete lysis buffer (iLB: 15 mM Tris HCl pH 7.4, 75 mM NaCl, 5 mM MgCl<sub>2</sub>, 0.25% NP-40, 0.125 mM Na<sub>3</sub>VO<sub>4</sub>, and 5 mM  $\beta$ -glycerophosphate) on a rotor

at 4°C for 5 mins. Two additional washes were performed with 250 µl complete LB (cLB: iLB supplemented with protease inhibitor, DTT, RNaseOUT, ribonucleoside vanadyl complex, and cycloheximide) on a rotor at 4°C for 5 mins per wash. The final wash solution was removed and the beads were eluted in the original volume of cLB. Oocytes were isolated as described and kept arrested at prophase I. Two hundred oocytes were collected in 5 µl 0.1% PVP in PBS, flash frozen in liquid nitrogen, and stored at -80°C. To homogenize the cells, 250 µl of cLB was added to the samples, samples were vortexed for 30 secs, and then incubated on ice for 10 mins. The homogenates were then centrifuged for 10 mins at maximum speed at 4°C and the supernatants were transferred to new tubes. Fifteen µl of each supernatant was saved as input samples and the rest were equally aliquoted for the CPEB1-IP and the IgG-IP (control). The volume of each sample was increased to 300 µl with cLB, 2 µl (2 µg) of the appropriate antibody (anti-CPEB: Abcam, ab73287 and control IgG: Abcam, ab172730) was added to each tube, and samples were incubated on a rotor for 2 hrs at 4°C. Thirty µl washed beads were then added to each tube and samples were incubated on a rotor overnight at 4°C. The beads of each sample were pelleted using a magnetic rack and washed 5 times on a rotor at 4°C with 750 µl wash buffer (WB: 30 mM Tris HCl pH 7.4, 200 mM NaCl, 10 mM MgCl<sub>2</sub>, 0.5% NP-40, 0.25 mM Na<sub>3</sub>VO<sub>4</sub>, 10mM β-glycerophosphate, 1x protease inhibitor, 1 mM DTT, 1M urea, and 1x RNase out) for 10 mins each wash. The beads were then pelleted via a magnetic rack and the WB removed. Two-hundred and fifty µl RLT buffer was added to each sample and the samples were vortexed for 30 secs. RNA extraction was performed following the Rneasy Plus Micro Kit protocol. Samples were eluted in 10 µl of RNase-free water and used for downstream RT-qPCR analysis.

### **Real-time quantitative PCR (RT-qPCR)**

Extracted RNA was reverse-transcribed using the SuperScript™ III First-Strand Synthesis System with random hexamer primers (Invitrogen, 18080051) and the resulting cDNA was diluted 1:6 with RNase-free water. Gene expression was measured using TaqMan Assays™ and



TaqMan™ Fast Advanced Master Mix (ThermoFisher, 4444557). The assays used were: *Astf1* (Mm00553165\_m1), *Bcl2l10* (Mm00478988\_m1), *Ccnb1* (Mm03053893\_gH), *Cdk8* (Mm01223097\_m1), *Depdc7* (Mm00522683\_m1), *Dnmt* (Mm01151063\_m1), *Dppa3* (Mm01184198\_g1), *Ewsr1* (Mm01191469\_g1), *Ing3* (Mm00458324\_m1), *Mos* (Mm01700521\_g1), *Nlrp5* (Mm01143609\_m1), *Obox5* (Mm00773197\_gH), *Oosp1* (Mm00504796\_m1), *Oosp2* (Mm03015599\_m1), *Padi6* (Mm00462201\_m1), *Smc4* (Mm00713073\_m1), *Tcl1* (Mm00493475\_m1), *Tiparp* (Mm00724822\_m1), *Zp1* (Mm00494367\_m1), *Zp2* (Mm00442173\_m1), and *Zp3* (Mm00442176\_m1). Ten µl reactions were run on 384-well plates with the QuantStudio 6 Flex Real-time PCR System. Gene expression was quantified via the  $2^{-\Delta\Delta Ct}$  method and statistical analysis was performed via GraphPad Prism 8.

### Construction of florescent protein reporters

The 3' UTR sequences of *Ccnb1*, *Ccnb2 short*, *Ewsr1*, *Mos*, *Oosp1*, *Oosp2*, *Smc4*, and *Zp2* were retrieved from the RNA-Seq .bam files using the Integrative Genomics Viewer (Supplementary Table 1). Primers were used to amplify the target 3' UTRs from oocyte cDNA and portions of YFP-containing vector. Using the Choo-Choo Cloning™ Kit (MCLAB, CCK-20), the PCR fragments were fused together and transfected into competent 5-α *E. coli* cells. The DNA plasmids of ampicillin-resistant bacteria were extracted using the QIAprep Spin Miniprep Kit (Qiagen, 27106) and the sequences confirmed via DNA sequencing. The extracted plasmid was then linearized using a forward primer upstream of the YFP sequence and a reverse primer to the 3'UTR with 20 additional thymine residues. The PCR product was then transcribed *in vitro* using the mMACHINE T7 Transcription Kit (Invitrogen, AM1344) and the resulting cRNA was purified using the MEGAclear™ Transcription Clean-Up Kit (Invitrogen, AM1908); cRNA were eluted in RNase-free water and kept at -80°C. The mCherry reporter was similarly produced.

However, the message contained no 3'UTR, but instead was polyadenylated (150-200 nts) using the Poly(A) Tailing Kit (Invitrogen, AM1350).

### **Oocyte microinjection**

Oocytes were collected as described and allowed to recover in  $\alpha$ C media for two hrs, after which they were transferred into HC media for microinjection. Oocytes were injected with 5-10 pl of a 12.5 ng/ $\mu$ l solution of the YFP reporter of interest mixed with *mCherry* mRNA and allowed to recover in  $\alpha$ C media for the specified amount of time before live cell imaging.

### **Live cell imaging and fluorescence microscopy**

Live cell imaging experiments were performed using a Nikon Eclipse T2000-E equipped with mobile stage and environmental chamber at 37°C and 5% CO<sub>2</sub>. Filter set: dichroic mirror YFP/CFP/mCherry 69008BS; Ypet channel (Ex: S500/20x 49057; Em: D535/30m 47281), mCherry channel (Ex: 580/25x 49829; Em: 632/60m). Images were processed and fluorescence was quantified using MetaMorph.

### **Poly(A) tail length (PAT) assay**

This assay was performed as previously described (Yang et al., 2017).

### **Histology**

Ovaries were dissected from eight week-old female mice, fixed in Bouin's solution, and preserved in 70% ethanol. Tissues were then processed, cut at 8  $\mu$ m, and stained (H&E) by the Cancer Center Tissue Core at UCSF.

### **Western blot**

Oocytes were collected in 0.1% PVP in DPBS and boiled for 3 mins at 95°C in 1x Laemmli Sample Buffer (Bio-Rad, 161-0747) supplemented with  $\beta$ -mercaptoethanol, proteinase inhibitor,

and phosphatase inhibitor. Samples were resolved on a 10% Laemmli gel and semi-dry transferred onto supported nitrocellulose membranes, 0.2  $\mu\text{m}$  (Bio-Rad, 1620097). Membranes were incubated in 5% blocking buffer for 1 hr then incubated for 18 hrs in primary antibody at 4°C. The antibodies used: 1:1000 rabbit anti-CPEB1 (Abcam, ab73287). The membrane was then washed in 1x TBST, incubated in the appropriate secondary antibodies, 1:20,000 rabbit IgG (GE Healthcare, NA934V) for 2 hrs, and washed again in 1x TBST. Clarity Western ECL substrate (Bio-Rad, 1705061) was then used to develop the membrane. All washes were done four times each round in TBST for 10 mins each wash.

### **Materials availability**

Further information and requests for resources and reagents should be directed to and will be fulfilled by the Lead Contact, Marco Conti ([marco.conti@ucsf.edu](mailto:marco.conti@ucsf.edu)).

### **Data and code availability**

Raw sequences and TMM-normalized CPM values from the RiboTag/RNA-Seq experiment will be available on UCSF Box. Scripts used for statistical analysis of the RiboTag/RNA-Seq data and those used to calculate CPE and PAS distances will be available on UCSF Box.

## References

- Bailey, T.L., Boden, M., Buske, F.A., Frith, M., Grant, C.E., Clementi, L., Ren, J.Y., Li, W.W., and Noble, W.S. (2009). MEME SUITE: tools for motif discovery and searching. *Nucleic Acids Research* 37, W202-W208.
- Ballantyne, S., Daniel, D.L., and Wickens, M. (1997). A dependent pathway of cytoplasmic polyadenylation reactions linked to cell cycle control by c-mos and CDK1 activation. *Molecular Biology of the Cell* 8, 1633-1648.
- Barnard, D.C., Ryan, K., Manley, J.L., and Richter, J.D. (2004). Symplekin and xGLD-2 are required for CPEB-mediated cytoplasmic polyadenylation. *Cell* 119, 641-651.
- Beaudoing, E., Freier, S., Wyatt, J.R., Claverie, J.M., and Gautheret, D. (2000). Patterns of variant polyadenylation signal usage in human genes. *Genome Research* 10, 1001-1010.
- Bolger, A.M., Lohse, M., and Usadel, B. (2014). Trimmomatic: a flexible trimmer for Illumina sequence data. *Bioinformatics* 30, 2114-2120.
- Calderone, V., Gallego, J., Fernandez-Miranda, G., Garcia-Pras, E., Maillo, C., Berzigotti, A., Mejias, M., Bava, F.A., Angulo-Urarte, A., Graupera, M., *et al.* (2016). Sequential Functions of CPEB1 and CPEB4 Regulate Pathologic Expression of Vascular Endothelial Growth Factor and Angiogenesis in Chronic Liver Disease. *Gastroenterology* 150, 982-+.
- Chen, J., Melton, C., Suh, N., Oh, J.S., Horner, K., Xie, F., Sette, C., Belloch, R., and Conti, M. (2011). Genome-wide analysis of translation reveals a critical role for deleted in azoospermia-like (Dazl) at the oocyte-to-zygote transition. *Genes & Development* 25, 755-766.
- Chen, T.P., and Dent, S.Y.R. (2014). Chromatin modifiers and remodellers: regulators of cellular differentiation. *Nature Reviews Genetics* 15, 93-106.
- Cheng, J., Maier, K.C., Avsec, Z., Rus, P., and Gagneur, J. (2017). Cis-regulatory elements explain most of the mRNA stability variation across genes in yeast. *Rna* 23, 1648-1659.
- Chiu, T.P., Yang, L., Zhou, T.Y., Main, B.J., Parker, S.C.J., Nuzhdin, S.V., Tullius, T.D., and Rohs, R. (2015). GBshape: a genome browser database for DNA shape annotations. *Nucleic Acids Research* 43, D103-D109.
- Clarke, H.J. (2012). Post-transcriptional control of gene expression during mouse oogenesis. *Results and problems in cell differentiation* 55, 1-21.
- Conti, M., and Franciosi, F. (2018). Acquisition of oocyte competence to develop as an embryo: integrated nuclear and cytoplasmic events. *Human Reproduction Update* 24, 245-266.
- Evans, T., Rosenthal, E.T., Youngblom, J., Distel, D., and Hunt, T. (1983). CYCLIN - A PROTEIN SPECIFIED BY MATERNAL MESSENGER-RNA IN SEA-URCHIN EGGS THAT IS DESTROYED AT EACH CLEAVAGE DIVISION. *Cell* 33, 389-396.
- Grant, C.E., Bailey, T.L., and Noble, W.S. (2011). FIMO: scanning for occurrences of a given motif. *Bioinformatics* 27, 1017-1018.
- Han, S.J., Martins, J.P.S., Yang, Y., Kang, M.K., Daldello, E.M., and Conti, M. (2017). The Translation of Cyclin B1 and B2 is Differentially Regulated during Mouse Oocyte Reentry into the Meiotic Cell Cycle. *Scientific Reports* 7.
- Horvat, F., Fulka, H., Jankele, R., Malik, R., Jun, M., Solcova, K., Sedlacek, R., Vlahovicek, K., Schultz, R.M., and Svoboda, P. (2018). Role of Cnot6l in maternal mRNA turnover. *Life Science Alliance* 1.
- Huang, D.W., Sherman, B.T., and Lempicki, R.A. (2009a). Bioinformatics enrichment tools: paths toward the comprehensive functional analysis of large gene lists. *Nucleic Acids Research* 37, 1-13.
- Huang, D.W., Sherman, B.T., and Lempicki, R.A. (2009b). Systematic and integrative analysis of large gene lists using DAVID bioinformatics resources. *Nature Protocols* 4, 44-57.

- Ivanova, I., Much, C., Di Giacomo, M., Azzi, C., Morgan, M., Moreira, P.N., Monahan, J., Carrieri, C., Enright, A.J., and O'Carroll, D. (2017). The RNA m(6)A Reader YTHDF2 Is Essential for the Post-transcriptional Regulation of the Maternal Transcriptome and Oocyte Competence. *Molecular Cell* 67, 1059-+.
- Jacobson, A., and Peltz, S.W. (1996). Interrelationships of the pathways of mRNA decay and translation in eukaryotic cells. *Annual Review of Biochemistry* 65, 693-739.
- Jonas, S., and Izaurralde, E. (2015). NON-CODING RNA Towards a molecular understanding of microRNA-mediated gene silencing. *Nature Reviews Genetics* 16, 421-433.
- Kim, D., Landmead, B., and Salzberg, S.L. (2015). HISAT: a fast spliced aligner with low memory requirements. *Nature Methods* 12, 357-U121.
- Kimble, J., and Crittenden, S.L. (2007). Controls of germline stem cells, entry into meiosis, and the Sperm/Oocyte decision in *Caenorhabditis elegans*. *Annual Review of Cell and Developmental Biology* 23, 405-433.
- Klemm, S.L., Shipony, Z., and Greenleaf, W.J. (2019). Chromatin accessibility and the regulatory epigenome. *Nature Reviews Genetics* 20, 207-220.
- Li, H., Handsaker, B., Wysoker, A., Fennell, T., Ruan, J., Homer, N., Marth, G., Abecasis, G., Durbin, R., and Genome Project Data, P. (2009). The Sequence Alignment/Map format and SAMtools. *Bioinformatics* 25, 2078-2079.
- Liu, Y.S., Lu, X.K., Shi, J.C., Yu, X.J., Zhang, X.X., Zhu, K., Yi, Z.H., Duan, E.K., and Li, L. (2016). BTG4 is a key regulator for maternal mRNA clearance during mouse early embryogenesis. *Journal of Molecular Cell Biology* 8, 366-368.
- Martins, J.P.S., Liu, X., Oke, A., Arora, R., Franciosi, F., Viville, S., Laird, D.J., Fung, J.C., and Conti, M. (2016). DAZL and CPEB1 regulate mRNA translation synergistically during oocyte maturation. *Journal of Cell Science* 129, 1271-1282.
- Mendez, R., Barnard, D., and Richter, J.D. (2002). Differential rRNA translation and meiotic progression require Cdc2-mediated CPEB destruction. *Embo Journal* 21, 1833-1844.
- Mendez, R., Hake, L.E., Andresson, T., Littlepage, L.E., Ruderman, J.V., and Richter, J.D. (2000a). Phosphorylation of CPE binding factor by Eg2 regulates translation of c-mos mRNA. *Nature* 404, 302-307.
- Mendez, R., Murthy, K.G.K., Ryan, K., Manley, J.L., and Richter, J.D. (2000b). Phosphorylation of CPEB by Eg2 mediates the recruitment of CPSF into an active cytoplasmic polyadenylation complex. *Molecular Cell* 6, 1253-1259.
- Mendez, R., and Richter, J.D. (2001). Translational control by CPEB: A means to the end. *Nature Reviews Molecular Cell Biology* 2, 521-529.
- Morgan, M., Much, C., DiGiacomo, M., Azzi, C., Ivanova, I., Vitsios, D.M., Pistollic, J., Collier, P., Moreira, P.N., Benes, V., *et al.* (2017). mRNA 3' uridylation and poly(A) tail length sculpt the mammalian maternal transcriptome. *Nature* 548, 347-+.
- Paillisson, A., Dade, S., Callebaut, I., Bontoux, M., Dalbies-Tran, R., Vaiman, D., and Monget, P. (2005). Identification, characterization and metagenome analysis of oocyte-specific genes organized in clusters in the mouse genome. *Bmc Genomics* 6.
- Park, J.E., Yi, H., Kim, Y., Chang, H., and Kim, V.N. (2016). Regulation of Poly(A) Tail and Translation during the Somatic Cell Cycle. *Molecular Cell* 62, 462-471.
- Pasternak, M., Pfender, S., Santhanam, B., and Schuh, M. (2016). The BTG4 and CAF1 complex prevents the spontaneous activation of eggs by deadenylating maternal mRNAs. *Open Biology* 6.
- Pique, M., Lopez, J.M., Foissac, S., Guigo, R., and Mendez, R. (2008). A combinatorial code for CPE-mediated translational control. *Cell* 132, 434-448.
- Racki, W.J., and Richter, J.D. (2006). CPEB controls oocyte growth and follicle development in the mouse. *Development* 133, 4527-4537.

- Radford, H.E., Meijer, H.A., and de Moor, C.H. (2008). Translational control by cytoplasmic polyadenylation in *Xenopus* oocytes. *Biochimica Et Biophysica Acta-Genes & Regulatory Mechanisms* 1779, 217-229.
- Richter, J.D. (2007). CPEB: a life in translation. *Trends in Biochemical Sciences* 32, 279-285.
- Richter, J.D., and Lasko, P. (2011). *Translational Control in Oocyte Development*. Cold Spring Harbor Perspectives in Biology 3.
- Rissland, O.S. (2017). The organization and regulation of mRNA-protein complexes. *Wiley Interdisciplinary Reviews-Rna* 8.
- Rissland, O.S., Subtelny, A.O., Wang, M., Lugowski, A., Nicholson, B., Laver, J.D., Sidhu, S.S., Smibert, C.A., Lipshitz, H.D., and Bartel, D.P. (2017). The influence of microRNAs and poly(A) tail length on endogenous mRNA-protein complexes. *Genome Biology* 18.
- Ritchie, M.E., Phipson, B., Wu, D., Hu, Y.F., Law, C.W., Shi, W., and Smyth, G.K. (2015). limma powers differential expression analyses for RNA-sequencing and microarray studies. *Nucleic Acids Research* 43.
- Robinson, M.D., McCarthy, D.J., and Smyth, G.K. (2010). edgeR: a Bioconductor package for differential expression analysis of digital gene expression data. *Bioinformatics* 26, 139-140.
- Rueden, C.T., Schindelin, J., Hiner, M.C., DeZonia, B.E., Walter, A.E., Arena, E.T., and Eliceiri, K.W. (2017). ImageJ2: ImageJ for the next generation of scientific image data. *Bmc Bioinformatics* 18.
- Seydoux, G., and Braun, R.E. (2006). Pathway to totipotency: Lessons from germ cells. *Cell* 127, 891-904.
- Sheets, M.D., Fox, C.A., Hunt, T., Vandewoude, G., and Wickens, M. (1994). THE 3'-UNTRANSLATED REGIONS OF C-MOS AND CYCLIN MESSENGER-RNAs STIMULATE TRANSLATION BY REGULATING CYTOPLASMIC POLYADENYLATION. *Genes & Development* 8, 926-938.
- Simon, R., and Richter, J.D. (1994). FURTHER ANALYSIS OF CYTOPLASMIC POLYADENYLATION IN XENOPUS EMBRYOS AND IDENTIFICATION OF EMBRYONIC CYTOPLASMIC POLYADENYLATION ELEMENT-BINDING PROTEINS. *Molecular and Cellular Biology* 14, 7867-7875.
- Su, Y.Q., Sugiura, K., Woo, Y., Wigglesworth, K., Kamdar, S., Affourtit, J., and Eppig, J.J. (2007). Selective degradation of transcripts during meiotic maturation of mouse oocytes. *Developmental Biology* 302, 104-117.
- Subtelny, A.O., Eichhorn, S.W., Chen, G.R., Sive, H., and Bartel, D.P. (2014). Poly(A)-tail profiling reveals an embryonic switch in translational control. *Nature* 508, 66-+.
- Tadros, W., and Lipshitz, H.D. (2005). Setting the stage for development: mRNA translation and stability during oocyte maturation and egg activation in *Drosophila*. *Developmental Dynamics* 232, 593-608.
- Tay, J., Hodgman, R., and Richter, J.D. (2000). The control of cyclin B1 mRNA translation during mouse oocyte maturation. *Developmental Biology* 221, 1-9.
- Tay, J., and Richter, J.D. (2001). Germ cell differentiation and synaptonemal complex formation are disrupted in CPEB knockout mice. *Developmental Cell* 1, 201-213.
- Wang, S.F., Kou, Z.H., Jing, Z.Y., Zhang, Y., Guo, X.Z., Dong, M.Q., Wilmut, I., and Gao, S.R. (2010). Proteome of mouse oocytes at different developmental stages. *Proceedings of the National Academy of Sciences of the United States of America* 107, 17639-17644.
- Wang, X., Lu, Z.K., Gomez, A., Hon, G.C., Yue, Y.N., Han, D.L., Fu, Y., Parisien, M., Dai, Q., Jia, G.F., *et al.* (2014). N<sup>6</sup>-methyladenosine-dependent regulation of messenger RNA stability. *Nature* 505, 117-+.
- Wickham, H. (2009). *ggplot2: Elegant Graphics for Data Analysis Introduction*. *Ggplot2: Elegant Graphics for Data Analysis*, 1-+.
- Wu, X.Y., and Brewer, G. (2012). The regulation of mRNA stability in mammalian cells: 2.0. *Gene* 500, 10-21.

- Yang, Y., Yang, C.-R., Han, S.J., Daldello, E.M., Cho, A., Martins, J.P.S., Xia, G., and Conti, M. (2017). Maternal mRNAs with distinct 3' UTRs define the temporal pattern of Ccnb1 synthesis during mouse oocyte meiotic maturation. *Genes & Development* 31, 1302-1307.
- Yartseva, V., and Giraldez, A.J. (2015). The Maternal-to-Zygotic Transition During Vertebrate Development: A Model for Reprogramming. *Maternal-to-Zygotic Transition* 113, 191-232.
- Yu, C., Ji, S.Y., Sha, Q.Q., Dang, Y.J., Zhou, J.J., Zhang, Y.L., Liu, Y., Wang, Z.W., Hu, B.Q., Sun, Q.Y., *et al.* (2016). BTG4 is a meiotic cell cycle-coupled maternal-zygotic transition licensing factor in oocytes. *Nature Structural & Molecular Biology* 23, 387-394.
